# Supplementary material
Source: Research Square preprint supplement (doi:10.21203/rs.3.rs-9209612/v1)
Supplement: Supplementary file 1 [file 334b2904c168b4fa0812b190.xlsx]

## Sheet: Supplementary Table S2
Entrez ID	Ensembl Gene ID	Symbol	Gene Name	location
874	ENSG00000159231	CBR3	carbonyl reductase 3	21q22.12
1728	ENSG00000181019	NQO1	NAD(P)H quinone dehydrogenase 1	16q22.1
64129	ENSG00000142910	TINAGL1	tubulointerstitial nephritis antigen like 1	1p35.2
9531	ENSG00000151929	BAG3	BCL2 associated athanogene 3	10q26.11
7345	ENSG00000154277	UCHL1	ubiquitin C-terminal hydrolase L1	4p13
5228	ENSG00000119630	PGF	placental growth factor	14q24.3
26278	ENSG00000151835	SACS	sacsin molecular chaperone	13q12.12
4778	ENSG00000123405	NFE2	nuclear factor, erythroid 2	12q13
23569	ENSG00000159339	PADI4	peptidyl arginine deiminase 4	1p36.13
55024	ENSG00000153064	BANK1	B cell scaffold protein with ankyrin repeats 1	4q24
6279	ENSG00000143546	S100A8	S100 calcium binding protein A8	1q21.3
5473	ENSG00000163736	PPBP	pro-platelet basic protein	4q13.3
6374	ENSG00000163735	CXCL5	C-X-C motif chemokine ligand 5	4q13.3
760	ENSG00000104267	CA2	carbonic anhydrase 2	8q21.2
