# Supplementary material
Source: Research Square preprint supplement (doi:10.21203/rs.3.rs-9209612/v1)
Supplement: Supplementary file 2 [file 9e237439f24052c918b758fc.xlsx]

## Sheet: Supplementary Table S1
GEO ID	Platform	Sample_ID	Cell_Type	PubMed ID
GSE11057	HG-U133_Plus_2	GSM279572	Tcm	19568420
GSE11057	HG-U133_Plus_2	GSM279573	Tcm	19568420
GSE11057	HG-U133_Plus_2	GSM279574	Tcm	19568420
GSE11057	HG-U133_Plus_2	GSM279575	Tcm	19568420
GSE11057	HG-U133_Plus_2	GSM279576	Tcm	19568420
GSE11057	HG-U133_Plus_2	GSM279577	Tem	19568420
GSE11057	HG-U133_Plus_2	GSM279578	Tem	19568420
GSE11057	HG-U133_Plus_2	GSM279579	Tem	19568420
GSE11057	HG-U133_Plus_2	GSM279580	Tem	19568420
GSE13906	HG-U133_Plus_2	GSM349848	Gamma delta T	20132662
GSE13906	HG-U133_Plus_2	GSM349849	Gamma delta T	20132662
GSE13906	HG-U133_Plus_2	GSM349850	Gamma delta T	20132662
GSE13906	HG-U133_Plus_2	GSM349851	Gamma delta T	20132662
GSE13906	HG-U133_Plus_2	GSM349852	Gamma delta T	20132662
GSE13906	HG-U133_Plus_2	GSM349853	Gamma delta T	20132662
GSE13906	HG-U133_Plus_2	GSM349854	Gamma delta T	20132662
GSE13906	HG-U133_Plus_2	GSM349855	Gamma delta T	20132662
GSE1460	HG-U133A	GSM24511	CD4 naive	15210650
GSE1460	HG-U133A	GSM24609	CD4 naive	15210650
GSE1460	HG-U133A	GSM24610	CD4 naive	15210650
GSE1460	HG-U133A	GSM24613	CD4 naive	15210650
GSE1460	HG-U133A	GSM24614	CD4 naive	15210650
GSE1460	HG-U133A	GSM24615	CD4 naive	15210650
GSE1460	HG-U133A	GSM24616	CD4 naive	15210650
GSE1460	HG-U133A	GSM24617	CD4 naive	15210650
GSE1460	HG-U133A	GSM24618	CD4 naive	15210650
GSE1460	HG-U133A	GSM24619	CD4 naive	15210650
GSE1460	HG-U133A	GSM24620	CD4 naive	15210650
GSE1460	HG-U133A	GSM24621	CD4 naive	15210650
GSE1460	HG-U133A	GSM24622	CD4 naive	15210650
GSE14879	HG-U133_Plus_2	GSM371679	NKT	25873174
GSE14879	HG-U133_Plus_2	GSM371680	NKT	25873174
GSE14879	HG-U133_Plus_2	GSM371681	NKT	25873174
GSE14879	HG-U133_Plus_2	GSM371682	NKT	25873174
GSE14879	HG-U133_Plus_2	GSM371683	NKT	25873174
GSE18313	HG-U133_Plus_2	GSM457223	Tc	20190191
GSE18313	HG-U133_Plus_2	GSM457225	Tc	20190191
GSE18313	HG-U133_Plus_2	GSM457227	Tc	20190191
GSE22045	HG-U133_Plus_2	GSM547998	nTreg	22562448
GSE22045	HG-U133_Plus_2	GSM547999	nTreg	22562448
GSE22045	HG-U133_Plus_2	GSM548000	CD4 naive	22562448
GSE22045	HG-U133_Plus_2	GSM548001	CD4 naive	22562448
GSE22886	HG-U133A	GSM565276	Th1	15789058
GSE22886	HG-U133A	GSM565277	Th1	15789058
GSE22886	HG-U133A	GSM565278	Th1	15789058
GSE22886	HG-U133A	GSM565279	Th1	15789058
GSE22886	HG-U133A	GSM565280	Th1	15789058
GSE22886	HG-U133A	GSM565281	Th2	15789058
GSE22886	HG-U133A	GSM565282	Th2	15789058
GSE22886	HG-U133A	GSM565283	Th2	15789058
GSE22886	HG-U133A	GSM565284	Th2	15789058
GSE22886	HG-U133A	GSM565285	Th2	15789058
GSE22886	HG-U133A	GSM565293	NK cell	15789058
GSE22886	HG-U133A	GSM565294	NK cell	15789058
GSE22886	HG-U133A	GSM565295	NK cell	15789058
GSE22886	HG-U133A	GSM565296	NK cell	15789058
GSE22886	HG-U133A	GSM565297	NK cell	15789058
GSE22886	HG-U133A	GSM565298	NK cell	15789058
GSE22886	HG-U133A	GSM565299	NK cell	15789058
GSE22886	HG-U133A	GSM565300	NK cell	15789058
GSE22886	HG-U133A	GSM565301	NK cell	15789058
GSE22886	HG-U133A	GSM565302	NK cell	15789058
GSE22886	HG-U133A	GSM565303	NK cell	15789058
GSE22886	HG-U133A	GSM565304	NK cell	15789058
GSE22886	HG-U133A	GSM565305	NK cell	15789058
GSE22886	HG-U133A	GSM565306	NK cell	15789058
GSE22886	HG-U133A	GSM565307	NK cell	15789058
GSE22886	HG-U133A	GSM565308	B cell	15789058
GSE22886	HG-U133A	GSM565309	B cell	15789058
GSE22886	HG-U133A	GSM565310	B cell	15789058
GSE22886	HG-U133A	GSM565311	B cell	15789058
GSE22886	HG-U133A	GSM565312	B cell	15789058
GSE22886	HG-U133A	GSM565313	B cell	15789058
GSE22886	HG-U133A	GSM565314	B cell	15789058
GSE22886	HG-U133A	GSM565315	B cell	15789058
GSE22886	HG-U133A	GSM565316	B cell	15789058
GSE22886	HG-U133A	GSM565317	B cell	15789058
GSE22886	HG-U133A	GSM565318	B cell	15789058
GSE22886	HG-U133A	GSM565319	B cell	15789058
GSE22886	HG-U133A	GSM565320	B cell	15789058
GSE22886	HG-U133A	GSM565321	B cell	15789058
GSE22886	HG-U133A	GSM565322	B cell	15789058
GSE22886	HG-U133A	GSM565330	Monocyte	15789058
GSE22886	HG-U133A	GSM565331	Monocyte	15789058
GSE22886	HG-U133A	GSM565332	Monocyte	15789058
GSE22886	HG-U133A	GSM565333	Monocyte	15789058
GSE22886	HG-U133A	GSM565334	Monocyte	15789058
GSE22886	HG-U133A	GSM565335	Monocyte	15789058
GSE22886	HG-U133A	GSM565336	Monocyte	15789058
GSE22886	HG-U133A	GSM565337	Monocyte	15789058
GSE22886	HG-U133A	GSM565338	Monocyte	15789058
GSE22886	HG-U133A	GSM565339	Monocyte	15789058
GSE22886	HG-U133A	GSM565340	Monocyte	15789058
GSE22886	HG-U133A	GSM565341	Monocyte	15789058
GSE22886	HG-U133A	GSM565354	Macrophage	15789058
GSE22886	HG-U133A	GSM565355	Macrophage	15789058
GSE22886	HG-U133A	GSM565356	Macrophage	15789058
GSE22886	HG-U133A	GSM565357	Macrophage	15789058
GSE22886	HG-U133A	GSM565358	Macrophage	15789058
GSE22886	HG-U133A	GSM565359	Macrophage	15789058
GSE22886	HG-U133A	GSM565360	Macrophage	15789058
GSE22886	HG-U133A	GSM565361	Macrophage	15789058
GSE22886	HG-U133A	GSM565362	Macrophage	15789058
GSE22886	HG-U133A	GSM565363	Macrophage	15789058
GSE22886	HG-U133A	GSM565364	Macrophage	15789058
GSE22886	HG-U133A	GSM565365	Macrophage	15789058
GSE22886	HG-U133A	GSM565366	Dendritic cell	15789058
GSE22886	HG-U133A	GSM565367	Dendritic cell	15789058
GSE22886	HG-U133A	GSM565368	Dendritic cell	15789058
GSE22886	HG-U133A	GSM565369	Dendritic cell	15789058
GSE22886	HG-U133A	GSM565370	Dendritic cell	15789058
GSE22886	HG-U133A	GSM565371	Dendritic cell	15789058
GSE22886	HG-U133A	GSM565372	Dendritic cell	15789058
GSE22886	HG-U133A	GSM565373	Dendritic cell	15789058
GSE22886	HG-U133A	GSM565374	Dendritic cell	15789058
GSE22886	HG-U133A	GSM565375	Dendritic cell	15789058
GSE22886	HG-U133A	GSM565376	Dendritic cell	15789058
GSE22886	HG-U133A	GSM565377	Dendritic cell	15789058
GSE22886	HG-U133A	GSM565378	Neutrophil	15789058
GSE22886	HG-U133A	GSM565379	Neutrophil	15789058
GSE22886	HG-U133A	GSM565380	Neutrophil	15789058
GSE22886	HG-U133A	GSM565381	Neutrophil	15789058
GSE22886	HG-U133A	GSM565382	Neutrophil	15789058
GSE24081	HT_HG-U133A	GSM592950	Exhausted	20890291
GSE24081	HT_HG-U133A	GSM592951	Exhausted	20890291
GSE24081	HT_HG-U133A	GSM592952	Exhausted	20890291
GSE24081	HT_HG-U133A	GSM592953	Exhausted	20890291
GSE24081	HT_HG-U133A	GSM592954	Exhausted	20890291
GSE24081	HT_HG-U133A	GSM592955	Exhausted	20890291
GSE24081	HT_HG-U133A	GSM592956	Exhausted	20890291
GSE24081	HT_HG-U133A	GSM592957	Exhausted	20890291
GSE24081	HT_HG-U133A	GSM592958	Exhausted	20890291
GSE24081	HT_HG-U133A	GSM592959	Exhausted	20890291
GSE24081	HT_HG-U133A	GSM592960	Exhausted	20890291
GSE24081	HT_HG-U133A	GSM592961	Exhausted	20890291
GSE24081	HT_HG-U133A	GSM592962	Exhausted	20890291
GSE24081	HT_HG-U133A	GSM592963	Exhausted	20890291
GSE24081	HT_HG-U133A	GSM592964	Exhausted	20890291
GSE24081	HT_HG-U133A	GSM592965	Exhausted	20890291
GSE24081	HT_HG-U133A	GSM592966	Exhausted	20890291
GSE24081	HT_HG-U133A	GSM592967	Exhausted	20890291
GSE24081	HT_HG-U133A	GSM592968	Exhausted	20890291
GSE24081	HT_HG-U133A	GSM592969	Exhausted	20890291
GSE24081	HT_HG-U133A	GSM592970	Exhausted	20890291
GSE24081	HT_HG-U133A	GSM592971	Exhausted	20890291
GSE24081	HT_HG-U133A	GSM592972	Exhausted	20890291
GSE24081	HT_HG-U133A	GSM592973	Exhausted	20890291
GSE24081	HT_HG-U133A	GSM592974	Exhausted	20890291
GSE24081	HT_HG-U133A	GSM592975	Exhausted	20890291
GSE24081	HT_HG-U133A	GSM592976	Exhausted	20890291
GSE24081	HT_HG-U133A	GSM592977	Exhausted	20890291
GSE24081	HT_HG-U133A	GSM592978	Exhausted	20890291
GSE24081	HT_HG-U133A	GSM592979	Exhausted	20890291
GSE24081	HT_HG-U133A	GSM592980	Exhausted	20890291
GSE24081	HT_HG-U133A	GSM592981	Exhausted	20890291
GSE24081	HT_HG-U133A	GSM592982	Exhausted	20890291
GSE24081	HT_HG-U133A	GSM592983	Exhausted	20890291
GSE24081	HT_HG-U133A	GSM592984	Exhausted	20890291
GSE24081	HT_HG-U133A	GSM592985	Exhausted	20890291
GSE24081	HT_HG-U133A	GSM592986	Exhausted	20890291
GSE24081	HT_HG-U133A	GSM592987	Exhausted	20890291
GSE24081	HT_HG-U133A	GSM592988	Exhausted	20890291
GSE24081	HT_HG-U133A	GSM592989	Exhausted	20890291
GSE24081	HT_HG-U133A	GSM592990	Exhausted	20890291
GSE24081	HT_HG-U133A	GSM592991	Exhausted	20890291
GSE24634	HG-U133A	GSM607516	iTreg	21347372
GSE24634	HG-U133A	GSM607517	iTreg	21347372
GSE24634	HG-U133A	GSM607518	iTreg	21347372
GSE24634	HG-U133A	GSM607528	iTreg	21347372
GSE24634	HG-U133A	GSM607529	iTreg	21347372
GSE24634	HG-U133A	GSM607530	iTreg	21347372
GSE24634	HG-U133A	GSM607540	iTreg	21347372
GSE24634	HG-U133A	GSM607541	iTreg	21347372
GSE24634	HG-U133A	GSM607542	iTreg	21347372
GSE24634	HG-U133A	GSM607552	iTreg	21347372
GSE24634	HG-U133A	GSM607553	iTreg	21347372
GSE24634	HG-U133A	GSM607554	iTreg	21347372
GSE26347	HG-U133_Plus_2	GSM647043	CD8 naive	29236685
GSE26347	HG-U133_Plus_2	GSM647044	CD8 naive	29236685
GSE26347	HG-U133_Plus_2	GSM647045	CD8 naive	29236685
GSE26347	HG-U133_Plus_2	GSM647046	CD8 naive	29236685
GSE26347	HG-U133_Plus_2	GSM691443	CD8 naive	29236685
GSE26347	HG-U133_Plus_2	GSM691444	CD8 naive	29236685
GSE26347	HG-U133_Plus_2	GSM691445	CD8 naive	29236685
GSE26347	HG-U133_Plus_2	GSM691446	CD8 naive	29236685
GSE26347	HG-U133_Plus_2	GSM691447	CD8 naive	29236685
GSE26347	HG-U133_Plus_2	GSM837584	CD8 naive	29236685
GSE26347	HG-U133_Plus_2	GSM837585	CD8 naive	29236685
GSE26347	HG-U133_Plus_2	GSM837586	CD8 naive	29236685
GSE26495	HG-U133_Plus_2	GSM651411	CD8 naive	21383243
GSE26495	HG-U133_Plus_2	GSM651412	CD8 naive	21383243
GSE26495	HG-U133_Plus_2	GSM651413	CD8 naive	21383243
GSE26495	HG-U133_Plus_2	GSM651415	CD8 naive	21383243
GSE28726	HG-U133_Plus_2	GSM711482	NKT	21632718
GSE28726	HG-U133_Plus_2	GSM711608	NKT	21632718
GSE28726	HG-U133_Plus_2	GSM711609	NKT	21632718
GSE28726	HG-U133_Plus_2	GSM711610	NKT	21632718
GSE28726	HG-U133_Plus_2	GSM711611	NKT	21632718
GSE28726	HG-U133_Plus_2	GSM711612	NKT	21632718
GSE28726	HG-U133_Plus_2	GSM711613	NKT	21632718
GSE28726	HG-U133_Plus_2	GSM711614	NKT	21632718
GSE28726	HG-U133_Plus_2	GSM711688	NKT	21632718
GSE28726	HG-U133_Plus_2	GSM711689	NKT	21632718
GSE28726	HG-U133_Plus_2	GSM711690	NKT	21632718
GSE28726	HG-U133_Plus_2	GSM711691	NKT	21632718
GSE32959	HG-U133_Plus_2	GSM816012	Th1	23110343
GSE32959	HG-U133_Plus_2	GSM816013	Th1	23110343
GSE32959	HG-U133_Plus_2	GSM816014	Th1	23110343
GSE32959	HG-U133_Plus_2	GSM816015	Th1	23110343
GSE32959	HG-U133_Plus_2	GSM816016	Th1	23110343
GSE32959	HG-U133_Plus_2	GSM816017	Th1	23110343
GSE32959	HG-U133_Plus_2	GSM816018	Th1	23110343
GSE32959	HG-U133_Plus_2	GSM816019	Th1	23110343
GSE32959	HG-U133_Plus_2	GSM816020	Th1	23110343
GSE32959	HG-U133_Plus_2	GSM816021	Th1	23110343
GSE32959	HG-U133_Plus_2	GSM816022	Th1	23110343
GSE32959	HG-U133_Plus_2	GSM816023	Th2	23110343
GSE32959	HG-U133_Plus_2	GSM816024	Th2	23110343
GSE32959	HG-U133_Plus_2	GSM816025	Th2	23110343
GSE32959	HG-U133_Plus_2	GSM816026	Th2	23110343
GSE32959	HG-U133_Plus_2	GSM816027	Th2	23110343
GSE32959	HG-U133_Plus_2	GSM816028	Th2	23110343
GSE32959	HG-U133_Plus_2	GSM816029	Th2	23110343
GSE32959	HG-U133_Plus_2	GSM816030	Th2	23110343
GSE32959	HG-U133_Plus_2	GSM816031	Th2	23110343
GSE32959	HG-U133_Plus_2	GSM816032	Th2	23110343
GSE32959	HG-U133_Plus_2	GSM816033	Th2	23110343
GSE32959	HG-U133_Plus_2	GSM816034	Th2	23110343
GSE33425	HG-U133_Plus_2	GSM825517	MAIT	22086415
GSE33425	HG-U133_Plus_2	GSM825518	MAIT	22086415
GSE33425	HG-U133_Plus_2	GSM825519	MAIT	22086415
GSE33425	HG-U133_Plus_2	GSM825520	MAIT	22086415
GSE33425	HG-U133_Plus_2	GSM825521	MAIT	22086415
GSE33425	HG-U133_Plus_2	GSM825522	MAIT	22086415
GSE33425	HG-U133_Plus_2	GSM825523	MAIT	22086415
GSE33425	HG-U133_Plus_2	GSM825524	MAIT	22086415
GSE33425	HG-U133_Plus_2	GSM826755	MAIT	22086415
GSE33425	HG-U133_Plus_2	GSM826756	MAIT	22086415
GSE33425	HG-U133_Plus_2	GSM826758	MAIT	22086415
GSE33425	HG-U133_Plus_2	GSM826759	MAIT	22086415
GSE33425	HG-U133_Plus_2	GSM826761	MAIT	22086415
GSE33425	HG-U133_Plus_2	GSM826762	MAIT	22086415
GSE43769	HG-U133_Plus_2	GSM1070753	Th1	22391114
GSE43769	HG-U133_Plus_2	GSM1070754	Th1	22391114
GSE43769	HG-U133_Plus_2	GSM1070755	Th2	22391114
GSE43769	HG-U133_Plus_2	GSM1070756	Th2	22391114
GSE43769	HG-U133_Plus_2	GSM1070757	Th1	22391114
GSE43769	HG-U133_Plus_2	GSM1070758	Th1	22391114
GSE43769	HG-U133_Plus_2	GSM1070759	Th2	22391114
GSE43769	HG-U133_Plus_2	GSM1070760	Th2	22391114
GSE43769	HG-U133_Plus_2	GSM1070761	Th1	22391114
GSE43769	HG-U133_Plus_2	GSM1070762	Th1	22391114
GSE43769	HG-U133_Plus_2	GSM1070763	Th2	22391114
GSE43769	HG-U133_Plus_2	GSM1070764	Th2	22391114
GSE49910	HG-U133_Plus_2	GSM1209561	Tcm	24053356
GSE49910	HG-U133_Plus_2	GSM1209562	Tcm	24053356
GSE49910	HG-U133_Plus_2	GSM1209563	Tcm	24053356
GSE49910	HG-U133_Plus_2	GSM1209573	Tem	24053356
GSE49910	HG-U133_Plus_2	GSM1209574	Tem	24053356
GSE49910	HG-U133_Plus_2	GSM1209575	Tem	24053356
GSE49910	HG-U133_Plus_2	GSM1209576	Tem	24053356
GSE49910	HG-U133_Plus_2	GSM1209577	Tem	24053356
GSE49910	HG-U133_Plus_2	GSM1209578	Tem	24053356
GSE49910	HG-U133_Plus_2	GSM1209579	Tem	24053356
GSE49910	HG-U133_Plus_2	GSM1209580	Tem	24053356
GSE49910	HG-U133_Plus_2	GSM1209581	CD8 naive	24053356
GSE49910	HG-U133_Plus_2	GSM1209582	CD8 naive	24053356
GSE49910	HG-U133_Plus_2	GSM1209583	CD8 naive	24053356
GSE49910	HG-U133_Plus_2	GSM1209584	CD8 naive	24053356
GSE51540	HG-U133_Plus_2	GSM1247614	Th17	24492460
GSE51540	HG-U133_Plus_2	GSM1247615	Th17	24492460
GSE51540	HG-U133_Plus_2	GSM1247616	Th17	24492460
GSE51540	HG-U133_Plus_2	GSM1247617	Th17	24492460
GSE51540	HG-U133_Plus_2	GSM1247618	Th17	24492460
GSE51540	HG-U133_Plus_2	GSM1247619	Th17	24492460
GSE51540	HG-U133_Plus_2	GSM1247620	Th17	24492460
GSE51540	HG-U133_Plus_2	GSM1247621	Th17	24492460
GSE51540	HG-U133_Plus_2	GSM1247622	Th17	24492460
GSE51540	HG-U133_Plus_2	GSM1247623	Th17	24492460
GSE51540	HG-U133_Plus_2	GSM1247624	Th17	24492460
GSE51540	HG-U133_Plus_2	GSM1247625	Th17	24492460
GSE51540	HG-U133_Plus_2	GSM1247626	Th17	24492460
GSE51540	HG-U133_Plus_2	GSM1247627	Th17	24492460
GSE51540	HG-U133_Plus_2	GSM1247628	Th17	24492460
GSE51540	HG-U133_Plus_2	GSM1247629	Th17	24492460
GSE51540	HG-U133_Plus_2	GSM1247630	Th17	24492460
GSE51540	HG-U133_Plus_2	GSM1247631	Th17	24492460
GSE61697	HG-U133_Plus_2	GSM1511432	Tcm	25931384
GSE61697	HG-U133_Plus_2	GSM1511433	Tcm	25931384
GSE61697	HG-U133_Plus_2	GSM1511434	Tcm	25931384
GSE61697	HG-U133_Plus_2	GSM1511435	Tcm	25931384
GSE61697	HG-U133_Plus_2	GSM1511436	Tcm	25931384
GSE61697	HG-U133_Plus_2	GSM1511437	Tcm	25931384
GSE61697	HG-U133_Plus_2	GSM1511438	Tem	25931384
GSE61697	HG-U133_Plus_2	GSM1511439	Tem	25931384
GSE61697	HG-U133_Plus_2	GSM1511440	Tem	25931384
GSE61697	HG-U133_Plus_2	GSM1511441	Tem	25931384
GSE61697	HG-U133_Plus_2	GSM1511442	Tem	25931384
GSE61697	HG-U133_Plus_2	GSM1511443	Tem	25931384
GSE72752	HG-U133A_2	GSM1869452	Exhausted	26485519
GSE72752	HG-U133A_2	GSM1869453	Exhausted	26485519
GSE72752	HG-U133A_2	GSM1869454	Exhausted	26485519
GSE72752	HG-U133A_2	GSM1869455	Exhausted	26485519
GSE72752	HG-U133A_2	GSM1869456	Exhausted	26485519
GSE72752	HG-U133A_2	GSM1869457	Exhausted	26485519
GSE72752	HG-U133A_2	GSM1869458	Exhausted	26485519
GSE73927	HG-U133_Plus_2	GSM1906368	Tr1	27653378
GSE73927	HG-U133_Plus_2	GSM1906370	Tfh	27653378
GSE84331	HG-U133_Plus_2	GSM2231980	CD8 naive	27707928
GSE84331	HG-U133_Plus_2	GSM2231981	CD8 naive	27707928
GSE84331	HG-U133_Plus_2	GSM2231982	CD8 naive	27707928
GSE84331	HG-U133_Plus_2	GSM2231983	CD8 naive	27707928
GSE84331	HG-U133_Plus_2	GSM2231984	CD8 naive	27707928
GSE85074	HG-U133_Plus_2	GSM2257341	CD8 naive	27617863
GSE85074	HG-U133_Plus_2	GSM2257342	CD8 naive	27617863
GSE85074	HG-U133_Plus_2	GSM2257343	Tem	27617863
GSE85074	HG-U133_Plus_2	GSM2257344	Tem	27617863
GSE85074	HG-U133_Plus_2	GSM2257345	Tcm	27617863
GSE93683	HG-U133_Plus_2	GSM2460433	CD8 naive	28522454
GSE93683	HG-U133_Plus_2	GSM2460434	Tcm	28522454
GSE93683	HG-U133_Plus_2	GSM2460435	Tem	28522454
GSE93683	HG-U133_Plus_2	GSM2460437	CD8 naive	28522454
GSE93683	HG-U133_Plus_2	GSM2460438	Tcm	28522454
GSE93683	HG-U133_Plus_2	GSM2460439	Tem	28522454
GSE93683	HG-U133_Plus_2	GSM2460441	CD8 naive	28522454
GSE93683	HG-U133_Plus_2	GSM2460442	Tcm	28522454
GSE93683	HG-U133_Plus_2	GSM2460443	Tem	28522454
GSE93683	HG-U133_Plus_2	GSM2460445	CD8 naive	28522454
GSE93683	HG-U133_Plus_2	GSM2460446	Tcm	28522454
GSE93683	HG-U133_Plus_2	GSM2460447	Tem	28522454
GSE93683	HG-U133_Plus_2	GSM2460449	CD8 naive	28522454
GSE93683	HG-U133_Plus_2	GSM2460450	Tcm	28522454
GSE93683	HG-U133_Plus_2	GSM2460451	Tem	28522454
GSE93683	HG-U133_Plus_2	GSM2460453	CD8 naive	28522454
GSE93683	HG-U133_Plus_2	GSM2460454	Tcm	28522454
GSE93683	HG-U133_Plus_2	GSM2460455	Tem	28522454
GSE93683	HG-U133_Plus_2	GSM2460457	CD8 naive	28522454
GSE93683	HG-U133_Plus_2	GSM2460458	Tcm	28522454
GSE93683	HG-U133_Plus_2	GSM2460459	Tem	28522454
GSE93683	HG-U133_Plus_2	GSM2460461	CD8 naive	28522454
GSE93683	HG-U133_Plus_2	GSM2460462	Tcm	28522454
GSE93683	HG-U133_Plus_2	GSM2460463	Tem	28522454
GSE93683	HG-U133_Plus_2	GSM2460465	CD8 naive	28522454
GSE93683	HG-U133_Plus_2	GSM2460466	Tcm	28522454
GSE93683	HG-U133_Plus_2	GSM2460467	Tem	28522454
GSE93683	HG-U133_Plus_2	GSM2460469	CD8 naive	28522454
GSE93683	HG-U133_Plus_2	GSM2460470	Tcm	28522454
GSE93683	HG-U133_Plus_2	GSM2460471	Tem	28522454
GSE93683	HG-U133_Plus_2	GSM2460473	CD8 naive	28522454
GSE93683	HG-U133_Plus_2	GSM2460474	Tcm	28522454
GSE93683	HG-U133_Plus_2	GSM2460475	Tem	28522454
GSE93683	HG-U133_Plus_2	GSM2460477	CD8 naive	28522454
GSE93683	HG-U133_Plus_2	GSM2460478	Tcm	28522454
GSE93683	HG-U133_Plus_2	GSM2460479	Tem	28522454
GSE94510	HG-U133_Plus_2	GSM2477208	CD4 naive	28522454
GSE94510	HG-U133_Plus_2	GSM2477209	CD4_Tcm	28522454
GSE94510	HG-U133_Plus_2	GSM2477210	CD4_Tem	28522454
GSE94510	HG-U133_Plus_2	GSM2477211	CD4 naive	28522454
GSE94510	HG-U133_Plus_2	GSM2477212	CD4_Tcm	28522454
GSE94510	HG-U133_Plus_2	GSM2477213	CD4_Tem	28522454
GSE94510	HG-U133_Plus_2	GSM2477214	CD4 naive	28522454
GSE94510	HG-U133_Plus_2	GSM2477215	CD4_Tcm	28522454
GSE94510	HG-U133_Plus_2	GSM2477216	CD4_Tem	28522454
GSE94510	HG-U133_Plus_2	GSM2477217	CD4 naive	28522454
GSE94510	HG-U133_Plus_2	GSM2477218	CD4_Tcm	28522454
GSE94510	HG-U133_Plus_2	GSM2477219	CD4_Tem	28522454
GSE94510	HG-U133_Plus_2	GSM2477220	CD4 naive	28522454
GSE94510	HG-U133_Plus_2	GSM2477221	CD4_Tcm	28522454
GSE94510	HG-U133_Plus_2	GSM2477222	CD4_Tem	28522454
GSE94510	HG-U133_Plus_2	GSM2477223	CD4 naive	28522454
GSE94510	HG-U133_Plus_2	GSM2477224	CD4_Tcm	28522454
GSE94510	HG-U133_Plus_2	GSM2477225	CD4_Tem	28522454
GSE94510	HG-U133_Plus_2	GSM2477226	CD4 naive	28522454
GSE94510	HG-U133_Plus_2	GSM2477227	CD4_Tcm	28522454
GSE94510	HG-U133_Plus_2	GSM2477228	CD4_Tem	28522454
GSE94510	HG-U133_Plus_2	GSM2477229	CD4 naive	28522454
GSE94510	HG-U133_Plus_2	GSM2477230	CD4_Tcm	28522454
GSE94510	HG-U133_Plus_2	GSM2477231	CD4_Tem	28522454
GSE94510	HG-U133_Plus_2	GSM2477232	CD4 naive	28522454
GSE94510	HG-U133_Plus_2	GSM2477233	CD4_Tcm	28522454
GSE94510	HG-U133_Plus_2	GSM2477234	CD4_Tem	28522454
GSE94510	HG-U133_Plus_2	GSM2477235	CD4 naive	28522454
GSE94510	HG-U133_Plus_2	GSM2477236	CD4_Tcm	28522454
GSE94510	HG-U133_Plus_2	GSM2477237	CD4_Tem	28522454
GSE94510	HG-U133_Plus_2	GSM2477238	CD4 naive	28522454
GSE94510	HG-U133_Plus_2	GSM2477239	CD4_Tcm	28522454
GSE94510	HG-U133_Plus_2	GSM2477240	CD4_Tem	28522454
GSE94510	HG-U133_Plus_2	GSM2477241	CD4 naive	28522454
GSE94510	HG-U133_Plus_2	GSM2477242	CD4_Tcm	28522454
GSE94510	HG-U133_Plus_2	GSM2477243	CD4_Tem	28522454
GSE98640	HG-U133_Plus_2	GSM2607414	CD8 naive	29024417
GSE98640	HG-U133_Plus_2	GSM2607415	CD8 naive	29024417
GSE98640	HG-U133_Plus_2	GSM2607416	CD8 naive	29024417
GSE98640	HG-U133_Plus_2	GSM2607417	CD8 naive	29024417
GSE98640	HG-U133_Plus_2	GSM2607418	CD8 naive	29024417
GSE98640	HG-U133_Plus_2	GSM2607419	CD8 naive	29024417
GSE98640	HG-U133_Plus_2	GSM2607420	Tcm	29024417
GSE98640	HG-U133_Plus_2	GSM2607421	Tcm	29024417
GSE98640	HG-U133_Plus_2	GSM2607422	Tcm	29024417
GSE98640	HG-U133_Plus_2	GSM2607423	Tcm	29024417
GSE98640	HG-U133_Plus_2	GSM2607424	Tcm	29024417
GSE98640	HG-U133_Plus_2	GSM2607425	Tcm	29024417
GSE98640	HG-U133_Plus_2	GSM2607426	Tem	29024417
GSE98640	HG-U133_Plus_2	GSM2607427	Tem	29024417
GSE98640	HG-U133_Plus_2	GSM2607428	Tem	29024417
GSE98640	HG-U133_Plus_2	GSM2607429	Tem	29024417
GSE98640	HG-U133_Plus_2	GSM2607430	Tem	29024417
GSE98640	HG-U133_Plus_2	GSM2607431	Tem	29024417
GSE63626	HG-U133_Plus_2	GSM1554131	Fibroblasts	26046848
GSE63626	HG-U133_Plus_2	GSM1554132	Fibroblasts	26046848
GSE63626	HG-U133_Plus_2	GSM1554133	Fibroblasts	26046848
GSE63626	HG-U133_Plus_2	GSM1554134	Fibroblasts	26046848
GSE63626	HG-U133_Plus_2	GSM1554135	Fibroblasts	26046848
GSE63626	HG-U133_Plus_2	GSM1554136	Fibroblasts	26046848
GSE63626	HG-U133_Plus_2	GSM1554137	Fibroblasts	26046848
GSE63626	HG-U133_Plus_2	GSM1554138	Fibroblasts	26046848
GSE63626	HG-U133_Plus_2	GSM1554139	Fibroblasts	26046848
GSE63626	HG-U133_Plus_2	GSM1554140	Fibroblasts	26046848
GSE63626	HG-U133_Plus_2	GSM1554141	Fibroblasts	26046848
GSE63626	HG-U133_Plus_2	GSM1554142	Fibroblasts	26046848
GSE63626	HG-U133_Plus_2	GSM1554143	Fibroblasts	26046848
GSE63626	HG-U133_Plus_2	GSM1554144	Fibroblasts	26046848
GSE63626	HG-U133_Plus_2	GSM1554145	Fibroblasts	26046848
GSE63626	HG-U133_Plus_2	GSM1554146	Fibroblasts	26046848
GSE63626	HG-U133_Plus_2	GSM1554147	Fibroblasts	26046848
GSE63626	HG-U133_Plus_2	GSM1554148	Fibroblasts	26046848
GSE63626	HG-U133_Plus_2	GSM1554149	Fibroblasts	26046848
GSE63626	HG-U133_Plus_2	GSM1554150	Fibroblasts	26046848
GSE63626	HG-U133_Plus_2	GSM1554151	Fibroblasts	26046848
GSE63626	HG-U133_Plus_2	GSM1554152	Fibroblasts	26046848
GSE63626	HG-U133_Plus_2	GSM1554153	Fibroblasts	26046848
GSE63626	HG-U133_Plus_2	GSM1554154	Fibroblasts	26046848
GSE63626	HG-U133_Plus_2	GSM1554155	Fibroblasts	26046848
GSE63626	HG-U133_Plus_2	GSM1554156	Fibroblasts	26046848
GSE63626	HG-U133_Plus_2	GSM1554157	Fibroblasts	26046848
GSE63626	HG-U133_Plus_2	GSM1554158	Fibroblasts	26046848
GSE63626	HG-U133_Plus_2	GSM1554159	Fibroblasts	26046848
GSE63626	HG-U133_Plus_2	GSM1554160	Fibroblasts	26046848
GSE63626	HG-U133_Plus_2	GSM1554161	Fibroblasts	26046848
GSE63626	HG-U133_Plus_2	GSM1554162	Fibroblasts	26046848
GSE63626	HG-U133_Plus_2	GSM1554163	Fibroblasts	26046848
GSE63626	HG-U133_Plus_2	GSM1554164	Fibroblasts	26046848
GSE63626	HG-U133_Plus_2	GSM1554165	Fibroblasts	26046848
GSE63626	HG-U133_Plus_2	GSM1554166	Fibroblasts	26046848
GSE63626	HG-U133_Plus_2	GSM1554167	Fibroblasts	26046848
GSE63626	HG-U133_Plus_2	GSM1554168	Fibroblasts	26046848
GSE63626	HG-U133_Plus_2	GSM1554169	Fibroblasts	26046848
GSE63626	HG-U133_Plus_2	GSM1554170	Fibroblasts	26046848
GSE63626	HG-U133_Plus_2	GSM1554171	Fibroblasts	26046848
GSE63626	HG-U133_Plus_2	GSM1554172	Fibroblasts	26046848
GSE63626	HG-U133_Plus_2	GSM1554173	Fibroblasts	26046848
GSE63626	HG-U133_Plus_2	GSM1554174	Fibroblasts	26046848
GSE63626	HG-U133_Plus_2	GSM1554175	Fibroblasts	26046848
GSE63626	HG-U133_Plus_2	GSM1554176	Fibroblasts	26046848
GSE63626	HG-U133_Plus_2	GSM1554177	Fibroblasts	26046848
GSE63626	HG-U133_Plus_2	GSM1554178	Fibroblasts	26046848
GSE63626	HG-U133_Plus_2	GSM1554179	Fibroblasts	26046848
GSE63626	HG-U133_Plus_2	GSM1554180	Fibroblasts	26046848
GSE63626	HG-U133_Plus_2	GSM1554181	Fibroblasts	26046848
GSE63626	HG-U133_Plus_2	GSM1554182	Fibroblasts	26046848
GSE63626	HG-U133_Plus_2	GSM1554183	Fibroblasts	26046848
GSE63626	HG-U133_Plus_2	GSM1554184	Fibroblasts	26046848
GSE63626	HG-U133_Plus_2	GSM1554185	Fibroblasts	26046848
GSE63626	HG-U133_Plus_2	GSM1554186	Fibroblasts	26046848
GSE63626	HG-U133_Plus_2	GSM1554187	Fibroblasts	26046848
GSE63626	HG-U133_Plus_2	GSM1554188	Fibroblasts	26046848
GSE63626	HG-U133_Plus_2	GSM1554189	Fibroblasts	26046848
GSE63626	HG-U133_Plus_2	GSM1554190	Fibroblasts	26046848
GSE63626	HG-U133_Plus_2	GSM1554191	Fibroblasts	26046848
GSE63626	HG-U133_Plus_2	GSM1554192	Fibroblasts	26046848
GSE63626	HG-U133_Plus_2	GSM1554193	Fibroblasts	26046848
GSE30169	HT_HG-U133A	GSM752709	Endothelial cells	26046848
GSE30169	HT_HG-U133A	GSM752710	Endothelial cells	26046848
GSE30169	HT_HG-U133A	GSM752713	Endothelial cells	26046848
GSE30169	HT_HG-U133A	GSM752714	Endothelial cells	26046848
GSE30169	HT_HG-U133A	GSM752717	Endothelial cells	26046848
GSE30169	HT_HG-U133A	GSM752718	Endothelial cells	26046848
GSE30169	HT_HG-U133A	GSM752721	Endothelial cells	26046848
GSE30169	HT_HG-U133A	GSM752722	Endothelial cells	26046848
GSE30169	HT_HG-U133A	GSM752725	Endothelial cells	26046848
GSE30169	HT_HG-U133A	GSM752726	Endothelial cells	26046848
GSE30169	HT_HG-U133A	GSM752729	Endothelial cells	26046848
GSE30169	HT_HG-U133A	GSM752730	Endothelial cells	26046848
GSE30169	HT_HG-U133A	GSM752733	Endothelial cells	26046848
GSE30169	HT_HG-U133A	GSM752734	Endothelial cells	26046848
GSE30169	HT_HG-U133A	GSM752737	Endothelial cells	26046848
GSE30169	HT_HG-U133A	GSM752738	Endothelial cells	26046848
GSE30169	HT_HG-U133A	GSM752741	Endothelial cells	26046848
GSE30169	HT_HG-U133A	GSM752742	Endothelial cells	26046848
GSE30169	HT_HG-U133A	GSM752745	Endothelial cells	26046848
GSE30169	HT_HG-U133A	GSM752746	Endothelial cells	26046848
GSE30169	HT_HG-U133A	GSM752749	Endothelial cells	26046848
GSE30169	HT_HG-U133A	GSM752750	Endothelial cells	26046848
GSE30169	HT_HG-U133A	GSM752753	Endothelial cells	26046848
GSE30169	HT_HG-U133A	GSM752754	Endothelial cells	26046848
GSE30169	HT_HG-U133A	GSM752757	Endothelial cells	26046848
GSE30169	HT_HG-U133A	GSM752758	Endothelial cells	26046848
GSE30169	HT_HG-U133A	GSM752761	Endothelial cells	26046848
GSE30169	HT_HG-U133A	GSM752762	Endothelial cells	26046848
GSE30169	HT_HG-U133A	GSM752765	Endothelial cells	26046848
GSE30169	HT_HG-U133A	GSM752766	Endothelial cells	26046848
GSE30169	HT_HG-U133A	GSM752769	Endothelial cells	26046848
GSE30169	HT_HG-U133A	GSM752770	Endothelial cells	26046848
GSE30169	HT_HG-U133A	GSM752773	Endothelial cells	26046848
GSE30169	HT_HG-U133A	GSM752774	Endothelial cells	26046848
GSE30169	HT_HG-U133A	GSM752777	Endothelial cells	26046848
GSE30169	HT_HG-U133A	GSM752778	Endothelial cells	26046848
GSE30169	HT_HG-U133A	GSM752781	Endothelial cells	26046848
GSE30169	HT_HG-U133A	GSM752782	Endothelial cells	26046848
GSE30169	HT_HG-U133A	GSM752785	Endothelial cells	26046848
GSE30169	HT_HG-U133A	GSM752786	Endothelial cells	26046848
GSE30169	HT_HG-U133A	GSM752789	Endothelial cells	26046848
GSE30169	HT_HG-U133A	GSM752790	Endothelial cells	26046848
GSE30169	HT_HG-U133A	GSM752793	Endothelial cells	26046848
GSE30169	HT_HG-U133A	GSM752794	Endothelial cells	26046848
GSE30169	HT_HG-U133A	GSM752797	Endothelial cells	26046848
GSE30169	HT_HG-U133A	GSM752798	Endothelial cells	26046848
GSE30169	HT_HG-U133A	GSM752801	Endothelial cells	26046848
GSE30169	HT_HG-U133A	GSM752802	Endothelial cells	26046848
GSE30169	HT_HG-U133A	GSM752805	Endothelial cells	26046848
GSE30169	HT_HG-U133A	GSM752806	Endothelial cells	26046848
GSE30169	HT_HG-U133A	GSM752809	Endothelial cells	26046848
GSE30169	HT_HG-U133A	GSM752810	Endothelial cells	26046848
GSE30169	HT_HG-U133A	GSM752813	Endothelial cells	26046848
GSE30169	HT_HG-U133A	GSM752814	Endothelial cells	26046848
GSE30169	HT_HG-U133A	GSM752817	Endothelial cells	26046848
GSE30169	HT_HG-U133A	GSM752818	Endothelial cells	26046848
GSE30169	HT_HG-U133A	GSM752821	Endothelial cells	26046848
GSE30169	HT_HG-U133A	GSM752822	Endothelial cells	26046848
GSE30169	HT_HG-U133A	GSM752825	Endothelial cells	26046848
GSE30169	HT_HG-U133A	GSM752828	Endothelial cells	26046848
GSE30169	HT_HG-U133A	GSM752829	Endothelial cells	26046848
GSE30169	HT_HG-U133A	GSM752832	Endothelial cells	26046848
GSE30169	HT_HG-U133A	GSM752833	Endothelial cells	26046848
GSE30169	HT_HG-U133A	GSM752836	Endothelial cells	26046848
GSE30169	HT_HG-U133A	GSM752837	Endothelial cells	26046848
GSE30169	HT_HG-U133A	GSM752840	Endothelial cells	26046848
GSE30169	HT_HG-U133A	GSM752841	Endothelial cells	26046848
GSE30169	HT_HG-U133A	GSM752844	Endothelial cells	26046848
GSE30169	HT_HG-U133A	GSM752845	Endothelial cells	26046848
GSE30169	HT_HG-U133A	GSM752848	Endothelial cells	26046848
GSE30169	HT_HG-U133A	GSM752849	Endothelial cells	26046848
GSE30169	HT_HG-U133A	GSM752852	Endothelial cells	26046848
GSE30169	HT_HG-U133A	GSM752853	Endothelial cells	26046848
GSE30169	HT_HG-U133A	GSM752856	Endothelial cells	26046848
GSE30169	HT_HG-U133A	GSM752857	Endothelial cells	26046848
GSE30169	HT_HG-U133A	GSM752860	Endothelial cells	26046848
GSE30169	HT_HG-U133A	GSM752861	Endothelial cells	26046848
GSE30169	HT_HG-U133A	GSM752864	Endothelial cells	26046848
GSE30169	HT_HG-U133A	GSM752865	Endothelial cells	26046848
GSE30169	HT_HG-U133A	GSM752868	Endothelial cells	26046848
GSE30169	HT_HG-U133A	GSM752869	Endothelial cells	26046848
GSE30169	HT_HG-U133A	GSM752872	Endothelial cells	26046848
GSE30169	HT_HG-U133A	GSM752873	Endothelial cells	26046848
GSE30169	HT_HG-U133A	GSM752876	Endothelial cells	26046848
GSE30169	HT_HG-U133A	GSM752877	Endothelial cells	26046848
GSE30169	HT_HG-U133A	GSM752880	Endothelial cells	26046848
GSE30169	HT_HG-U133A	GSM752881	Endothelial cells	26046848
GSE30169	HT_HG-U133A	GSM752884	Endothelial cells	26046848
GSE30169	HT_HG-U133A	GSM752885	Endothelial cells	26046848
GSE30169	HT_HG-U133A	GSM752888	Endothelial cells	26046848
GSE30169	HT_HG-U133A	GSM752889	Endothelial cells	26046848
GSE30169	HT_HG-U133A	GSM752892	Endothelial cells	26046848
GSE30169	HT_HG-U133A	GSM752893	Endothelial cells	26046848
GSE30169	HT_HG-U133A	GSM752896	Endothelial cells	26046848
GSE30169	HT_HG-U133A	GSM752897	Endothelial cells	26046848
GSE30169	HT_HG-U133A	GSM752900	Endothelial cells	26046848
GSE30169	HT_HG-U133A	GSM752901	Endothelial cells	26046848
GSE30169	HT_HG-U133A	GSM752904	Endothelial cells	26046848
GSE30169	HT_HG-U133A	GSM752905	Endothelial cells	26046848
GSE30169	HT_HG-U133A	GSM752908	Endothelial cells	26046848
GSE30169	HT_HG-U133A	GSM752909	Endothelial cells	26046848
GSE30169	HT_HG-U133A	GSM752912	Endothelial cells	26046848
GSE30169	HT_HG-U133A	GSM752913	Endothelial cells	26046848
GSE30169	HT_HG-U133A	GSM752916	Endothelial cells	26046848
GSE30169	HT_HG-U133A	GSM752917	Endothelial cells	26046848
GSE30169	HT_HG-U133A	GSM752919	Endothelial cells	26046848
GSE30169	HT_HG-U133A	GSM752920	Endothelial cells	26046848
GSE30169	HT_HG-U133A	GSM752923	Endothelial cells	26046848
GSE30169	HT_HG-U133A	GSM752924	Endothelial cells	26046848
GSE30169	HT_HG-U133A	GSM752927	Endothelial cells	26046848
GSE30169	HT_HG-U133A	GSM752928	Endothelial cells	26046848
GSE30169	HT_HG-U133A	GSM752931	Endothelial cells	26046848
GSE30169	HT_HG-U133A	GSM752934	Endothelial cells	26046848
GSE30169	HT_HG-U133A	GSM752937	Endothelial cells	26046848
GSE30169	HT_HG-U133A	GSM752938	Endothelial cells	26046848
GSE30169	HT_HG-U133A	GSM752941	Endothelial cells	26046848
GSE30169	HT_HG-U133A	GSM752942	Endothelial cells	26046848
GSE30169	HT_HG-U133A	GSM752945	Endothelial cells	26046848
GSE30169	HT_HG-U133A	GSM752946	Endothelial cells	26046848
GSE30169	HT_HG-U133A	GSM752949	Endothelial cells	26046848
GSE30169	HT_HG-U133A	GSM752950	Endothelial cells	26046848
GSE30169	HT_HG-U133A	GSM753033	Endothelial cells	26046848
GSE30169	HT_HG-U133A	GSM753034	Endothelial cells	26046848
GSE30169	HT_HG-U133A	GSM753040	Endothelial cells	26046848
GSE30169	HT_HG-U133A	GSM753041	Endothelial cells	26046848
GSE30169	HT_HG-U133A	GSM753046	Endothelial cells	26046848
GSE30169	HT_HG-U133A	GSM753048	Endothelial cells	26046848
GSE30169	HT_HG-U133A	GSM753052	Endothelial cells	26046848
GSE30169	HT_HG-U133A	GSM753053	Endothelial cells	26046848
GSE30169	HT_HG-U133A	GSM753056	Endothelial cells	26046848
GSE30169	HT_HG-U133A	GSM753057	Endothelial cells	26046848
GSE30169	HT_HG-U133A	GSM753060	Endothelial cells	26046848
GSE30169	HT_HG-U133A	GSM753061	Endothelial cells	26046848
GSE30169	HT_HG-U133A	GSM753064	Endothelial cells	26046848
GSE30169	HT_HG-U133A	GSM753065	Endothelial cells	26046848
GSE30169	HT_HG-U133A	GSM753068	Endothelial cells	26046848
GSE30169	HT_HG-U133A	GSM753069	Endothelial cells	26046848
GSE30169	HT_HG-U133A	GSM753072	Endothelial cells	26046848
GSE30169	HT_HG-U133A	GSM753075	Endothelial cells	26046848
GSE30169	HT_HG-U133A	GSM753076	Endothelial cells	26046848
GSE30169	HT_HG-U133A	GSM753079	Endothelial cells	26046848
GSE30169	HT_HG-U133A	GSM753080	Endothelial cells	26046848
GSE30169	HT_HG-U133A	GSM753083	Endothelial cells	26046848
GSE30169	HT_HG-U133A	GSM753084	Endothelial cells	26046848
GSE30169	HT_HG-U133A	GSM753087	Endothelial cells	26046848
GSE30169	HT_HG-U133A	GSM753088	Endothelial cells	26046848
GSE30169	HT_HG-U133A	GSM753091	Endothelial cells	26046848
GSE30169	HT_HG-U133A	GSM753092	Endothelial cells	26046848
GSE30169	HT_HG-U133A	GSM753095	Endothelial cells	26046848
GSE30169	HT_HG-U133A	GSM753096	Endothelial cells	26046848
GSE30169	HT_HG-U133A	GSM753099	Endothelial cells	26046848
GSE30169	HT_HG-U133A	GSM753100	Endothelial cells	26046848
GSE30169	HT_HG-U133A	GSM753103	Endothelial cells	26046848
GSE30169	HT_HG-U133A	GSM753105	Endothelial cells	26046848
GSE30169	HT_HG-U133A	GSM753106	Endothelial cells	26046848
GSE30169	HT_HG-U133A	GSM753109	Endothelial cells	26046848
GSE30169	HT_HG-U133A	GSM753110	Endothelial cells	26046848
GSE30169	HT_HG-U133A	GSM753113	Endothelial cells	26046848
GSE30169	HT_HG-U133A	GSM753116	Endothelial cells	26046848
GSE30169	HT_HG-U133A	GSM753117	Endothelial cells	26046848
GSE30169	HT_HG-U133A	GSM753120	Endothelial cells	26046848
GSE30169	HT_HG-U133A	GSM753121	Endothelial cells	26046848
GSE30169	HT_HG-U133A	GSM753124	Endothelial cells	26046848
GSE30169	HT_HG-U133A	GSM753125	Endothelial cells	26046848
GSE30169	HT_HG-U133A	GSM753128	Endothelial cells	26046848
GSE30169	HT_HG-U133A	GSM753129	Endothelial cells	26046848
GSE30169	HT_HG-U133A	GSM753132	Endothelial cells	26046848
GSE30169	HT_HG-U133A	GSM753133	Endothelial cells	26046848
GSE30169	HT_HG-U133A	GSM753136	Endothelial cells	26046848
GSE30169	HT_HG-U133A	GSM753139	Endothelial cells	26046848
GSE30169	HT_HG-U133A	GSM753140	Endothelial cells	26046848
GSE30169	HT_HG-U133A	GSM753143	Endothelial cells	26046848
GSE30169	HT_HG-U133A	GSM753144	Endothelial cells	26046848
GSE30169	HT_HG-U133A	GSM753147	Endothelial cells	26046848
GSE30169	HT_HG-U133A	GSM753148	Endothelial cells	26046848
GSE30169	HT_HG-U133A	GSM753151	Endothelial cells	26046848
GSE30169	HT_HG-U133A	GSM753152	Endothelial cells	26046848
GSE30169	HT_HG-U133A	GSM753155	Endothelial cells	26046848
GSE30169	HT_HG-U133A	GSM753156	Endothelial cells	26046848
GSE30169	HT_HG-U133A	GSM753159	Endothelial cells	26046848
GSE30169	HT_HG-U133A	GSM753160	Endothelial cells	26046848
GSE30169	HT_HG-U133A	GSM753163	Endothelial cells	26046848
GSE30169	HT_HG-U133A	GSM753164	Endothelial cells	26046848
GSE30169	HT_HG-U133A	GSM753167	Endothelial cells	26046848
GSE30169	HT_HG-U133A	GSM753170	Endothelial cells	26046848
GSE30169	HT_HG-U133A	GSM753171	Endothelial cells	26046848
GSE30169	HT_HG-U133A	GSM753174	Endothelial cells	26046848
GSE30169	HT_HG-U133A	GSM753175	Endothelial cells	26046848
GSE30169	HT_HG-U133A	GSM753178	Endothelial cells	26046848
GSE30169	HT_HG-U133A	GSM753179	Endothelial cells	26046848
GSE30169	HT_HG-U133A	GSM753182	Endothelial cells	26046848
GSE30169	HT_HG-U133A	GSM753183	Endothelial cells	26046848
GSE30169	HT_HG-U133A	GSM753186	Endothelial cells	26046848
GSE30169	HT_HG-U133A	GSM753187	Endothelial cells	26046848
GSE30169	HT_HG-U133A	GSM753190	Endothelial cells	26046848
GSE30169	HT_HG-U133A	GSM753191	Endothelial cells	26046848
GSE30169	HT_HG-U133A	GSM753194	Endothelial cells	26046848
GSE30169	HT_HG-U133A	GSM753195	Endothelial cells	26046848
GSE30169	HT_HG-U133A	GSM753198	Endothelial cells	26046848
GSE30169	HT_HG-U133A	GSM753199	Endothelial cells	26046848
GSE30169	HT_HG-U133A	GSM753202	Endothelial cells	26046848
GSE30169	HT_HG-U133A	GSM753203	Endothelial cells	26046848
GSE30169	HT_HG-U133A	GSM753206	Endothelial cells	26046848
GSE30169	HT_HG-U133A	GSM753207	Endothelial cells	26046848
GSE30169	HT_HG-U133A	GSM753210	Endothelial cells	26046848
GSE30169	HT_HG-U133A	GSM753211	Endothelial cells	26046848
GSE30169	HT_HG-U133A	GSM753214	Endothelial cells	26046848
GSE30169	HT_HG-U133A	GSM753215	Endothelial cells	26046848
GSE30169	HT_HG-U133A	GSM753218	Endothelial cells	26046848
GSE30169	HT_HG-U133A	GSM753219	Endothelial cells	26046848
GSE30169	HT_HG-U133A	GSM753222	Endothelial cells	26046848
GSE30169	HT_HG-U133A	GSM753223	Endothelial cells	26046848
GSE30169	HT_HG-U133A	GSM753226	Endothelial cells	26046848
GSE30169	HT_HG-U133A	GSM753227	Endothelial cells	26046848
GSE30169	HT_HG-U133A	GSM753230	Endothelial cells	26046848
GSE30169	HT_HG-U133A	GSM753231	Endothelial cells	26046848
GSE30169	HT_HG-U133A	GSM753234	Endothelial cells	26046848
GSE30169	HT_HG-U133A	GSM753235	Endothelial cells	26046848
GSE30169	HT_HG-U133A	GSM753238	Endothelial cells	26046848
GSE30169	HT_HG-U133A	GSM753239	Endothelial cells	26046848
GSE30169	HT_HG-U133A	GSM753242	Endothelial cells	26046848
GSE30169	HT_HG-U133A	GSM753243	Endothelial cells	26046848
GSE30169	HT_HG-U133A	GSM753246	Endothelial cells	26046848
GSE30169	HT_HG-U133A	GSM753247	Endothelial cells	26046848
GSE30169	HT_HG-U133A	GSM753250	Endothelial cells	26046848
GSE30169	HT_HG-U133A	GSM753251	Endothelial cells	26046848
GSE30169	HT_HG-U133A	GSM753254	Endothelial cells	26046848
GSE30169	HT_HG-U133A	GSM753255	Endothelial cells	26046848
GSE30169	HT_HG-U133A	GSM753258	Endothelial cells	26046848
GSE30169	HT_HG-U133A	GSM753259	Endothelial cells	26046848
GSE30169	HT_HG-U133A	GSM753262	Endothelial cells	26046848
GSE30169	HT_HG-U133A	GSM753263	Endothelial cells	26046848
GSE30169	HT_HG-U133A	GSM753266	Endothelial cells	26046848
GSE30169	HT_HG-U133A	GSM753267	Endothelial cells	26046848
GSE30169	HT_HG-U133A	GSM753270	Endothelial cells	26046848
GSE30169	HT_HG-U133A	GSM753271	Endothelial cells	26046848
GSE30169	HT_HG-U133A	GSM753274	Endothelial cells	26046848
GSE30169	HT_HG-U133A	GSM753275	Endothelial cells	26046848
GSE30169	HT_HG-U133A	GSM753278	Endothelial cells	26046848
GSE30169	HT_HG-U133A	GSM753279	Endothelial cells	26046848
GSE30169	HT_HG-U133A	GSM753282	Endothelial cells	26046848
GSE30169	HT_HG-U133A	GSM753283	Endothelial cells	26046848
GSE30169	HT_HG-U133A	GSM753285	Endothelial cells	26046848
GSE30169	HT_HG-U133A	GSM753286	Endothelial cells	26046848
GSE30169	HT_HG-U133A	GSM753289	Endothelial cells	26046848
GSE30169	HT_HG-U133A	GSM753290	Endothelial cells	26046848
GSE30169	HT_HG-U133A	GSM753293	Endothelial cells	26046848
GSE30169	HT_HG-U133A	GSM753294	Endothelial cells	26046848
GSE30169	HT_HG-U133A	GSM753297	Endothelial cells	26046848
GSE30169	HT_HG-U133A	GSM753298	Endothelial cells	26046848
GSE30169	HT_HG-U133A	GSM753301	Endothelial cells	26046848
GSE30169	HT_HG-U133A	GSM753302	Endothelial cells	26046848
GSE30169	HT_HG-U133A	GSM753305	Endothelial cells	26046848
GSE30169	HT_HG-U133A	GSM753306	Endothelial cells	26046848
GSE30169	HT_HG-U133A	GSM753309	Endothelial cells	26046848
GSE30169	HT_HG-U133A	GSM753310	Endothelial cells	26046848
GSE30169	HT_HG-U133A	GSM753313	Endothelial cells	26046848
GSE30169	HT_HG-U133A	GSM753314	Endothelial cells	26046848
GSE30169	HT_HG-U133A	GSM753317	Endothelial cells	26046848
GSE30169	HT_HG-U133A	GSM753318	Endothelial cells	26046848
GSE30169	HT_HG-U133A	GSM753321	Endothelial cells	26046848
GSE30169	HT_HG-U133A	GSM753322	Endothelial cells	26046848
GSE30169	HT_HG-U133A	GSM753325	Endothelial cells	26046848
GSE30169	HT_HG-U133A	GSM753326	Endothelial cells	26046848
GSE30169	HT_HG-U133A	GSM753329	Endothelial cells	26046848
GSE30169	HT_HG-U133A	GSM753330	Endothelial cells	26046848
GSE30169	HT_HG-U133A	GSM753333	Endothelial cells	26046848
GSE30169	HT_HG-U133A	GSM753334	Endothelial cells	26046848
GSE30169	HT_HG-U133A	GSM753337	Endothelial cells	26046848
GSE30169	HT_HG-U133A	GSM753338	Endothelial cells	26046848
GSE30169	HT_HG-U133A	GSM753341	Endothelial cells	26046848
GSE30169	HT_HG-U133A	GSM753342	Endothelial cells	26046848
GSE30169	HT_HG-U133A	GSM753345	Endothelial cells	26046848
GSE30169	HT_HG-U133A	GSM753346	Endothelial cells	26046848
GSE30169	HT_HG-U133A	GSM753349	Endothelial cells	26046848
GSE30169	HT_HG-U133A	GSM753350	Endothelial cells	26046848
GSE30169	HT_HG-U133A	GSM753353	Endothelial cells	26046848
GSE30169	HT_HG-U133A	GSM753354	Endothelial cells	26046848
GSE30169	HT_HG-U133A	GSM753357	Endothelial cells	26046848
GSE30169	HT_HG-U133A	GSM753360	Endothelial cells	26046848
GSE30169	HT_HG-U133A	GSM753361	Endothelial cells	26046848
GSE30169	HT_HG-U133A	GSM753364	Endothelial cells	26046848
GSE30169	HT_HG-U133A	GSM753365	Endothelial cells	26046848
GSE30169	HT_HG-U133A	GSM753368	Endothelial cells	26046848
GSE30169	HT_HG-U133A	GSM753369	Endothelial cells	26046848
GSE30169	HT_HG-U133A	GSM753372	Endothelial cells	26046848
GSE30169	HT_HG-U133A	GSM753373	Endothelial cells	26046848
GSE30169	HT_HG-U133A	GSM753376	Endothelial cells	26046848
GSE30169	HT_HG-U133A	GSM753377	Endothelial cells	26046848
GSE30169	HT_HG-U133A	GSM753380	Endothelial cells	26046848
GSE30169	HT_HG-U133A	GSM753381	Endothelial cells	26046848
GSE30169	HT_HG-U133A	GSM753384	Endothelial cells	26046848
GSE30169	HT_HG-U133A	GSM753385	Endothelial cells	26046848
GSE30169	HT_HG-U133A	GSM753388	Endothelial cells	26046848
GSE30169	HT_HG-U133A	GSM753389	Endothelial cells	26046848
GSE30169	HT_HG-U133A	GSM753392	Endothelial cells	26046848
GSE30169	HT_HG-U133A	GSM753393	Endothelial cells	26046848
GSE30169	HT_HG-U133A	GSM753396	Endothelial cells	26046848
GSE30169	HT_HG-U133A	GSM753397	Endothelial cells	26046848
GSE30169	HT_HG-U133A	GSM753402	Endothelial cells	26046848
GSE30169	HT_HG-U133A	GSM753403	Endothelial cells	26046848
GSE30169	HT_HG-U133A	GSM753407	Endothelial cells	26046848
GSE30169	HT_HG-U133A	GSM753408	Endothelial cells	26046848
GSE30169	HT_HG-U133A	GSM753413	Endothelial cells	26046848
GSE30169	HT_HG-U133A	GSM753414	Endothelial cells	26046848
GSE30169	HT_HG-U133A	GSM753419	Endothelial cells	26046848
GSE30169	HT_HG-U133A	GSM753420	Endothelial cells	26046848
unknown	Ion Torrent Proton	ERR875281	platelet	29323256
unknown	Ion Torrent Proton	ERR875282	platelet	29323256
unknown	Ion Torrent Proton	ERR875283	platelet	29323256
unknown	Ion Torrent Proton	ERR875284	platelet	29323256
unknown	Ion Torrent Proton	ERR875285	platelet	29323256
unknown	Ion Torrent Proton	ERR875286	platelet	29323256
unknown	Ion Torrent Proton	ERR875287	platelet	29323256
unknown	Ion Torrent Proton	ERR875288	platelet	29323256
unknown	Illumina HiSeq 2500	ERR2868052	platelet	29323256
unknown	Illumina HiSeq 2500	ERR2868053	platelet	31209307
unknown	Illumina HiSeq 2500	ERR2868054	platelet	31209307
unknown	Illumina HiSeq 2500	ERR2868055	platelet	31209307
unknown	Illumina HiSeq 2500	ERR2868056	platelet	26172280
unknown	Illumina HiSeq 2500	ERR2868057	platelet	26172280
unknown	Illumina HiSeq 2500	ERR2868058	platelet	26172280
unknown	Illumina HiSeq 2500	ERR2868059	platelet	26172280
unknown	Illumina HiSeq 2500	ERR2868060	platelet	26172280
GSE65705	Illumina HiSeq 2000	SRR1792682	platelet	26172280
GSE65705	Illumina HiSeq 2000	SRR1792681	platelet	26172280
GSE65705	Illumina HiSeq 2000	SRR1792684	platelet	26172280
GSE65705	Illumina HiSeq 2000	SRR1792679	platelet	26172280
GSE65705	Illumina HiSeq 2000	SRR1792680	platelet	26172280
GSE65705	Illumina HiSeq 2000	SRR1792683	platelet	26172280
GSE65705	Illumina HiSeq 2000	SRR1792677	platelet	26172280
GSE65705	Illumina HiSeq 2000	SRR1792678	platelet	26172280
GSE65705	Illumina HiSeq 2000	SRR1792693	platelet	26172280
GSE65705	Illumina HiSeq 2000	SRR1792710	platelet	26172280
GSE65705	Illumina HiSeq 2000	SRR1792700	platelet	26172280
GSE65705	Illumina HiSeq 2000	SRR1792692	platelet	26172280
GSE65705	Illumina HiSeq 2000	SRR1792709	platelet	26172280
GSE65705	Illumina HiSeq 2000	SRR1792690	platelet	26172280
GSE65705	Illumina HiSeq 2000	SRR1792689	platelet	26172280
GSE65705	Illumina HiSeq 2000	SRR1792705	platelet	30519591
GSE65705	Illumina HiSeq 2000	SRR1792687	platelet	30519591
GSE65705	Illumina HiSeq 2000	SRR1792696	platelet	30519591
GSE65705	Illumina HiSeq 2000	SRR1792707	platelet	30519591
GSE65705	Illumina HiSeq 2000	SRR1792699	platelet	30519591
GSE65705	Illumina HiSeq 2000	SRR2981913	platelet	30519591
GSE65705	Illumina HiSeq 2000	SRR1792702	platelet	30519591
GSE65705	Illumina HiSeq 2000	SRR1792685	platelet	30519591
GSE65705	Illumina HiSeq 2000	SRR1792691	platelet	30519591
GSE65705	Illumina HiSeq 2000	SRR1792694	platelet	26367242
GSE65705	Illumina HiSeq 2000	SRR1792701	platelet	26367242
GSE65705	Illumina HiSeq 2000	SRR1792695	platelet	26367242
GSE65705	Illumina HiSeq 2000	SRR1792706	platelet	26367242
GSE65705	Illumina HiSeq 2000	SRR1792708	platelet	26367242
GSE65705	Illumina HiSeq 2000	SRR1792688	platelet	26367242
GSE65705	Illumina HiSeq 2000	SRR1792697	platelet	26367242
GSE65705	Illumina HiSeq 2000	SRR1792704	platelet	26367242
GSE65705	Illumina HiSeq 2000	SRR1792686	platelet	26367242
GSE68086	Illumina HiSeq 2500	SRR1982716	platelet	26367242
GSE68086	Illumina HiSeq 2500	SRR1982717	platelet	26367242
GSE68086	Illumina HiSeq 2500	SRR1982718	platelet	26367242
GSE68086	Illumina HiSeq 2500	SRR1982719	platelet	26367242
GSE68086	Illumina HiSeq 2500	SRR1982720	platelet	26367242
GSE68086	Illumina HiSeq 2500	SRR1982721	platelet	26367242
GSE68086	Illumina HiSeq 2500	SRR1982722	platelet	26367242
GSE68086	Illumina HiSeq 2500	SRR1982723	platelet	26367242
GSE68086	Illumina HiSeq 2500	SRR1982724	platelet	26367242
GSE68086	Illumina HiSeq 2500	SRR1982725	platelet	26367242
GSE68086	Illumina HiSeq 2500	SRR1982726	platelet	26367242
GSE68086	Illumina HiSeq 2500	SRR1982727	platelet	26367242
GSE68086	Illumina HiSeq 2500	SRR1982728	platelet	26367242
GSE68086	Illumina HiSeq 2500	SRR1982729	platelet	26367242
GSE68086	Illumina HiSeq 2500	SRR1982730	platelet	26367242
GSE68086	Illumina HiSeq 2500	SRR1982731	platelet	26367242
GSE65705	Illumina HiSeq 2000	SRR2981929	platelet	26367242
GSE68086	Illumina HiSeq 2500	SRR1982733	platelet	26367242
GSE68086	Illumina HiSeq 2500	SRR1982734	platelet	26367242
GSE68086	Illumina HiSeq 2500	SRR1982735	platelet	26367242
GSE68086	Illumina HiSeq 2500	SRR1982736	platelet	26367242
GSE68086	Illumina HiSeq 2500	SRR1982737	platelet	26367242
GSE68086	Illumina HiSeq 2500	SRR1982738	platelet	26367242
GSE68086	Illumina HiSeq 2500	SRR1982739	platelet	26367242
GSE68086	Illumina HiSeq 2500	SRR1982740	platelet	26525104
GSE68086	Illumina HiSeq 2500	SRR1982741	platelet	26525104
GSE68086	Illumina HiSeq 2500	SRR1982743	platelet	26525104
GSE68086	Illumina HiSeq 2500	SRR1982744	platelet	26525104
GSE68086	Illumina HiSeq 2500	SRR1982745	platelet	26525104
GSE68086	Illumina HiSeq 2500	SRR1982654	platelet	26525104
GSE68086	Illumina HiSeq 2500	SRR1982655	platelet	26525104
GSE68086	Illumina HiSeq 2500	SRR1982656	platelet	26525104
GSE68086	Illumina HiSeq 2500	SRR1982657	platelet	26525104
GSE68086	Illumina HiSeq 2500	SRR1982658	platelet	26525104
GSE68086	Illumina HiSeq 2500	SRR1982659	platelet	26525104
GSE68086	Illumina HiSeq 2500	SRR1982660	platelet	26525104
GSE68086	Illumina HiSeq 2500	SRR1982661	platelet	26525104
GSE68086	Illumina HiSeq 2500	SRR1982662	platelet	26525104
GSE68086	Illumina HiSeq 2500	SRR1982663	platelet	26525104
GSE68086	Illumina HiSeq 2500	SRR1982664	platelet	26525104
GSE68086	Illumina HiSeq 2500	SRR1982665	platelet	26367242
GSE68086	Illumina HiSeq 2500	SRR1982666	platelet	26525104
GSE68086	Illumina HiSeq 2500	SRR1982667	platelet	26525104
GSE68086	Illumina HiSeq 2500	SRR1982668	platelet	26525104
GSE68086	Illumina HiSeq 2500	SRR1982669	platelet	26525104
GSE68086	Illumina HiSeq 2500	SRR1982670	platelet	26525104
GSE68086	Illumina HiSeq 2500	SRR1982671	platelet	26525104
GSE68086	Illumina HiSeq 2500	SRR1982672	platelet	26525104
GSE68086	Illumina HiSeq 2500	SRR1982673	platelet	26525104
GSE68086	Illumina HiSeq 2500	SRR1982674	platelet	26525104
GSE68086	Illumina HiSeq 2500	SRR1982675	platelet	26525104
GSE68086	Illumina HiSeq 2500	SRR1982676	platelet	26525104
GSE68086	Illumina HiSeq 2500	SRR1982677	platelet	26525104
GSE68086	Illumina HiSeq 2500	SRR1982678	platelet	26525104
GSE68086	Illumina HiSeq 2500	SRR1982679	platelet	26525104
GSE68086	Illumina HiSeq 2500	SRR1982680	platelet	26525104
GSE68086	Illumina HiSeq 2500	SRR1982681	platelet	26525104
GSE68086	Illumina HiSeq 2500	SRR1982682	platelet	26525104
GSE68086	Illumina HiSeq 2500	SRR1982683	platelet	26525104
GSE68086	Illumina HiSeq 2500	SRR1982806	platelet	26525104
GSE68086	Illumina HiSeq 2500	SRR1982807	platelet	26525104
GSE68086	Illumina HiSeq 2500	SRR1982808	platelet	26525104
GSE68086	Illumina HiSeq 2500	SRR1982809	platelet	26525104
GSE68086	Illumina HiSeq 2500	SRR1982810	platelet	26525104
GSE68086	Illumina HiSeq 2500	SRR1982811	platelet	26525104
GSE68086	Illumina HiSeq 2500	SRR1982812	platelet	26525104
GSE68086	Illumina HiSeq 2500	SRR1982813	platelet	26525104
GSE68086	Illumina HiSeq 2500	SRR1982814	platelet	26525104
GSE68086	Illumina HiSeq 2500	SRR1982815	platelet	26525104
GSE68086	Illumina HiSeq 2500	SRR1982816	platelet	26525104
GSE68086	Illumina HiSeq 2500	SRR1982817	platelet	26525104
GSE68086	Illumina HiSeq 2500	SRR1982818	platelet	26525104
GSE68086	Illumina HiSeq 2500	SRR1982819	platelet	26525104
GSE68086	Illumina HiSeq 2500	SRR1982820	platelet	26525104
GSE68086	Illumina HiSeq 2500	SRR1982821	platelet	26525104
GSE68086	Illumina HiSeq 2500	SRR1982822	platelet	26525104
GSE68086	Illumina HiSeq 2500	SRR1982823	platelet	26525104
GSE68086	Illumina HiSeq 2500	SRR1982824	platelet	26525104
GSE68086	Illumina HiSeq 2500	SRR1982825	platelet	26525104
GSE68086	Illumina HiSeq 2500	SRR1982826	platelet	26525104
GSE68086	Illumina HiSeq 2500	SRR1982827	platelet	26525104
GSE68086	Illumina HiSeq 2500	SRR1982828	platelet	26525104
GSE68086	Illumina HiSeq 2500	SRR1982829	platelet	26525104
GSE68086	Illumina HiSeq 2500	SRR1982830	platelet	26525104
GSE68086	Illumina HiSeq 2500	SRR1982776	platelet	26525104
GSE68086	Illumina HiSeq 2500	SRR1982777	platelet	26525104
GSE68086	Illumina HiSeq 2500	SRR1982778	platelet	26525104
GSE68086	Illumina HiSeq 2500	SRR1982779	platelet	26525104
GSE68086	Illumina HiSeq 2500	SRR1982780	platelet	26525104
GSE68086	Illumina HiSeq 2500	SRR1982781	platelet	26525104
GSE68086	Illumina HiSeq 2500	SRR1982788	platelet	26525104
GSE68086	Illumina HiSeq 2500	SRR1982782	platelet	26525104
GSE68086	Illumina HiSeq 2500	SRR1982783	platelet	26525104
GSE68086	Illumina HiSeq 2500	SRR1982784	platelet	26525104
GSE68086	Illumina HiSeq 2500	SRR1982785	platelet	26525104
GSE68086	Illumina HiSeq 2500	SRR1982786	platelet	26525104
GSE68086	Illumina HiSeq 2500	SRR1982787	platelet	26525104
GSE68086	Illumina HiSeq 2500	SRR1982789	platelet	26525104
GSE68086	Illumina HiSeq 2500	SRR1982790	platelet	26525104
GSE68086	Illumina HiSeq 2500	SRR1982791	platelet	26525104
GSE68086	Illumina HiSeq 2500	SRR1982792	platelet	26525104
GSE68086	Illumina HiSeq 2500	SRR1982793	platelet	26525104
GSE68086	Illumina HiSeq 2500	SRR1982794	platelet	26525104
GSE68086	Illumina HiSeq 2500	SRR1982795	platelet	26525104
GSE68086	Illumina HiSeq 2500	SRR1982796	platelet	26525104
GSE68086	Illumina HiSeq 2500	SRR1982797	platelet	26525104
GSE68086	Illumina HiSeq 2500	SRR1982798	platelet	26525104
GSE68086	Illumina HiSeq 2500	SRR1982799	platelet	26525104
GSE68086	Illumina HiSeq 2500	SRR1982800	platelet	26525104
GSE68086	Illumina HiSeq 2500	SRR1982801	platelet	26525104
GSE68086	Illumina HiSeq 2500	SRR1982802	platelet	26525104
GSE68086	Illumina HiSeq 2500	SRR1982803	platelet	26525104
GSE68086	Illumina HiSeq 2500	SRR1982804	platelet	26525104
GSE68086	Illumina HiSeq 2500	SRR1982805	platelet	26525104
GSE68086	Illumina HiSeq 2500	SRR1982684	platelet	26525104
GSE68086	Illumina HiSeq 2500	SRR1982685	platelet	26525104
GSE68086	Illumina HiSeq 2500	SRR1982686	platelet	26525104
GSE68086	Illumina HiSeq 2500	SRR1982687	platelet	26525104
GSE68086	Illumina HiSeq 2500	SRR1982688	platelet	26525104
GSE68086	Illumina HiSeq 2500	SRR1982689	platelet	26525104
GSE68086	Illumina HiSeq 2500	SRR1982690	platelet	26525104
GSE68086	Illumina HiSeq 2500	SRR1982691	platelet	26525104
GSE68086	Illumina HiSeq 2500	SRR1982692	platelet	26525104
GSE68086	Illumina HiSeq 2500	SRR1982693	platelet	26525104
GSE68086	Illumina HiSeq 2500	SRR1982694	platelet	26525104
GSE68086	Illumina HiSeq 2500	SRR1982696	platelet	26525104
GSE68086	Illumina HiSeq 2500	SRR1982697	platelet	26525104
GSE68086	Illumina HiSeq 2500	SRR1982732	platelet	26525104
GSE68086	Illumina HiSeq 2500	SRR1982700	platelet	26525104
GSE68086	Illumina HiSeq 2500	SRR1982701	platelet	26525104
GSE68086	Illumina HiSeq 2500	SRR1982702	platelet	26525104
GSE68086	Illumina HiSeq 2500	SRR1982695	platelet	26525104
GSE68086	Illumina HiSeq 2500	SRR1982703	platelet	26525104
GSE68086	Illumina HiSeq 2500	SRR1982704	platelet	26525104
GSE68086	Illumina HiSeq 2500	SRR1982705	platelet	26525104
GSE68086	Illumina HiSeq 2500	SRR1982706	platelet	26525104
GSE68086	Illumina HiSeq 2500	SRR1982707	platelet	26525104
GSE68086	Illumina HiSeq 2500	SRR1982708	platelet	26525104
GSE68086	Illumina HiSeq 2500	SRR1982709	platelet	26525104
GSE68086	Illumina HiSeq 2500	SRR1982710	platelet	26525104
GSE68086	Illumina HiSeq 2500	SRR1982713	platelet	26525104
GSE68086	Illumina HiSeq 2500	SRR1982714	platelet	26525104
GSE68086	Illumina HiSeq 2500	SRR1982715	platelet	26525104
GSE68086	Illumina HiSeq 2500	SRR1982584	platelet	26525104
GSE68086	Illumina HiSeq 2500	SRR1982585	platelet	26525104
GSE68086	Illumina HiSeq 2500	SRR1982586	platelet	26525104
GSE68086	Illumina HiSeq 2500	SRR1982587	platelet	26525104
GSE68086	Illumina HiSeq 2500	SRR1982588	platelet	26525104
GSE68086	Illumina HiSeq 2500	SRR1982589	platelet	26525104
GSE68086	Illumina HiSeq 2500	SRR1982590	platelet	26525104
GSE68086	Illumina HiSeq 2500	SRR1982591	platelet	26525104
GSE68086	Illumina HiSeq 2500	SRR1982592	platelet	26525104
GSE68086	Illumina HiSeq 2500	SRR1982593	platelet	26525104
GSE68086	Illumina HiSeq 2500	SRR1982594	platelet	26525104
GSE68086	Illumina HiSeq 2500	SRR1982595	platelet	26525104
GSE68086	Illumina HiSeq 2500	SRR1982596	platelet	26525104
GSE68086	Illumina HiSeq 2500	SRR1982597	platelet	26525104
GSE68086	Illumina HiSeq 2500	SRR1982598	platelet	26525104
GSE68086	Illumina HiSeq 2500	SRR1982599	platelet	26525104
GSE68086	Illumina HiSeq 2500	SRR1982600	platelet	26525104
GSE68086	Illumina HiSeq 2500	SRR1982601	platelet	26525104
GSE68086	Illumina HiSeq 2500	SRR1982602	platelet	26525104
GSE68086	Illumina HiSeq 2500	SRR1982603	platelet	26525104
GSE68086	Illumina HiSeq 2500	SRR1982604	platelet	26525104
GSE68086	Illumina HiSeq 2500	SRR1982605	platelet	26525104
GSE68086	Illumina HiSeq 2500	SRR1982606	platelet	26525104
GSE68086	Illumina HiSeq 2500	SRR1982607	platelet	26525104
GSE68086	Illumina HiSeq 2500	SRR1982608	platelet	26525104
GSE68086	Illumina HiSeq 2500	SRR1982609	platelet	26525104
GSE68086	Illumina HiSeq 2500	SRR1982610	platelet	26525104
GSE68086	Illumina HiSeq 2500	SRR1982611	platelet	26525104
GSE68086	Illumina HiSeq 2500	SRR1982612	platelet	26525104
GSE68086	Illumina HiSeq 2500	SRR1982613	platelet	26525104
GSE68086	Illumina HiSeq 2500	SRR1982614	platelet	26525104
GSE68086	Illumina HiSeq 2500	SRR1982615	platelet	26525104
GSE68086	Illumina HiSeq 2500	SRR1982616	platelet	26525104
GSE68086	Illumina HiSeq 2500	SRR1982617	platelet	26525104
GSE68086	Illumina HiSeq 2500	SRR1982648	platelet	26525104
GSE68086	Illumina HiSeq 2500	SRR1982649	platelet	26525104
GSE68086	Illumina HiSeq 2500	SRR1982650	platelet	26525104
GSE68086	Illumina HiSeq 2500	SRR1982651	platelet	26525104
GSE68086	Illumina HiSeq 2500	SRR1982652	platelet	26525104
GSE68086	Illumina HiSeq 2500	SRR1982653	platelet	26525104
GSE68086	Illumina HiSeq 2500	SRR1982746	platelet	26525104
GSE68086	Illumina HiSeq 2500	SRR1982747	platelet	26525104
GSE68086	Illumina HiSeq 2500	SRR1982748	platelet	26525104
GSE68086	Illumina HiSeq 2500	SRR1982749	platelet	26525104
GSE68086	Illumina HiSeq 2500	SRR1982750	platelet	26525104
GSE68086	Illumina HiSeq 2500	SRR1982751	platelet	26525104
GSE68086	Illumina HiSeq 2500	SRR1982752	platelet	26525104
GSE68086	Illumina HiSeq 2500	SRR1982753	platelet	26525104
GSE68086	Illumina HiSeq 2500	SRR1982754	platelet	26525104
GSE68086	Illumina HiSeq 2500	SRR1982758	platelet	26525104
GSE68086	Illumina HiSeq 2500	SRR1982759	platelet	26525104
GSE68086	Illumina HiSeq 2500	SRR1982760	platelet	26525104
GSE68086	Illumina HiSeq 2500	SRR1982761	platelet	26525104
GSE68086	Illumina HiSeq 2500	SRR1982755	platelet	26525104
GSE68086	Illumina HiSeq 2500	SRR1982756	platelet	26525104
GSE68086	Illumina HiSeq 2500	SRR1982757	platelet	26525104
GSE68086	Illumina HiSeq 2500	SRR1982762	platelet	26525104
GSE68086	Illumina HiSeq 2500	SRR1982763	platelet	26525104
GSE68086	Illumina HiSeq 2500	SRR1982764	platelet	26525104
GSE68086	Illumina HiSeq 2500	SRR1982765	platelet	26525104
GSE68086	Illumina HiSeq 2500	SRR1982766	platelet	26525104
GSE68086	Illumina HiSeq 2500	SRR1982767	platelet	26525104
GSE68086	Illumina HiSeq 2500	SRR1982768	platelet	26525104
GSE68086	Illumina HiSeq 2500	SRR1982769	platelet	26525104
GSE68086	Illumina HiSeq 2500	SRR1982770	platelet	26525104
GSE68086	Illumina HiSeq 2500	SRR1982771	platelet	26525104
GSE68086	Illumina HiSeq 2500	SRR1982772	platelet	26525104
GSE68086	Illumina HiSeq 2500	SRR1982773	platelet	26525104
GSE68086	Illumina HiSeq 2500	SRR1982774	platelet	26525104
GSE68086	Illumina HiSeq 2500	SRR1982775	platelet	26525104
GSE68086	Illumina HiSeq 2500	SRR1982620	platelet	26525104
GSE68086	Illumina HiSeq 2500	SRR1982621	platelet	26525104
GSE68086	Illumina HiSeq 2500	SRR1982618	platelet	26525104
GSE68086	Illumina HiSeq 2500	SRR1982619	platelet	26525104
GSE68086	Illumina HiSeq 2500	SRR1982622	platelet	26525104
GSE68086	Illumina HiSeq 2500	SRR1982623	platelet	26525104
GSE68086	Illumina HiSeq 2500	SRR1982624	platelet	26525104
GSE68086	Illumina HiSeq 2500	SRR1982625	platelet	26525104
GSE68086	Illumina HiSeq 2500	SRR1982626	platelet	26525104
GSE68086	Illumina HiSeq 2500	SRR1982627	platelet	26525104
GSE68086	Illumina HiSeq 2500	SRR1982628	platelet	26525104
GSE68086	Illumina HiSeq 2500	SRR1982629	platelet	26525104
GSE68086	Illumina HiSeq 2500	SRR1982636	platelet	26525104
GSE68086	Illumina HiSeq 2500	SRR1982632	platelet	26525104
GSE68086	Illumina HiSeq 2500	SRR1982633	platelet	26525104
GSE68086	Illumina HiSeq 2500	SRR1982634	platelet	26525104
GSE68086	Illumina HiSeq 2500	SRR1982635	platelet	26525104
GSE68086	Illumina HiSeq 2500	SRR1982630	platelet	26525104
GSE68086	Illumina HiSeq 2500	SRR1982631	platelet	26525104
GSE68086	Illumina HiSeq 2500	SRR1982637	platelet	26525104
GSE68086	Illumina HiSeq 2500	SRR1982638	platelet	26525104
GSE68086	Illumina HiSeq 2500	SRR1982639	platelet	26525104
GSE68086	Illumina HiSeq 2500	SRR1982640	platelet	26525104
GSE68086	Illumina HiSeq 2500	SRR1982641	platelet	26525104
GSE68086	Illumina HiSeq 2500	SRR1982642	platelet	26525104
GSE68086	Illumina HiSeq 2500	SRR1982643	platelet	26525104
GSE68086	Illumina HiSeq 2500	SRR1982644	platelet	26525104
GSE68086	Illumina HiSeq 2500	SRR1982645	platelet	26525104
GSE68086	Illumina HiSeq 2500	SRR1982646	platelet	26525104
GSE68086	Illumina HiSeq 2500	SRR1982647	platelet	26525104
GSE68086	Illumina HiSeq 2500	SRR2096504	platelet	26525104
GSE68086	Illumina HiSeq 2500	SRR2096505	platelet	26525104
GSE68086	Illumina HiSeq 2500	SRR2096506	platelet	26525104
GSE68086	Illumina HiSeq 2500	SRR2096507	platelet	26525104
GSE68086	Illumina HiSeq 2500	SRR2096508	platelet	26525104
GSE68086	Illumina HiSeq 2500	SRR2096509	platelet	26525104
GSE68086	Illumina HiSeq 2500	SRR2096510	platelet	26525104
GSE68086	Illumina HiSeq 2500	SRR2096512	platelet	26525104
GSE68086	Illumina HiSeq 2500	SRR2096513	platelet	26525104
GSE68086	Illumina HiSeq 2500	SRR2096514	platelet	26525104
GSE68086	Illumina HiSeq 2500	SRR2096515	platelet	26525104
GSE68086	Illumina HiSeq 2500	SRR2096516	platelet	26525104
GSE68086	Illumina HiSeq 2500	SRR2096517	platelet	26525104
GSE68086	Illumina HiSeq 2500	SRR2096518	platelet	26525104
GSE68086	Illumina HiSeq 2500	SRR2096519	platelet	26525104
GSE68086	Illumina HiSeq 2500	SRR2096520	platelet	26525104
GSE68086	Illumina HiSeq 2500	SRR2096481	platelet	26525104
GSE68086	Illumina HiSeq 2500	SRR2096482	platelet	26525104
GSE68086	Illumina HiSeq 2500	SRR2096483	platelet	26525104
GSE68086	Illumina HiSeq 2500	SRR2096484	platelet	26525104
GSE68086	Illumina HiSeq 2500	SRR2096485	platelet	26525104
GSE68086	Illumina HiSeq 2500	SRR2096486	platelet	26525104
GSE68086	Illumina HiSeq 2500	SRR2096487	platelet	26525104
GSE68086	Illumina HiSeq 2500	SRR2096488	platelet	26525104
GSE68086	Illumina HiSeq 2500	SRR2096489	platelet	26525104
GSE68086	Illumina HiSeq 2500	SRR2096490	platelet	26525104
GSE68086	Illumina HiSeq 2500	SRR2096491	platelet	26525104
GSE68086	Illumina HiSeq 2500	SRR2096492	platelet	26525104
GSE68086	Illumina HiSeq 2500	SRR2096493	platelet	26525104
GSE68086	Illumina HiSeq 2500	SRR2096494	platelet	26525104
GSE68086	Illumina HiSeq 2500	SRR2096495	platelet	26525104
GSE68086	Illumina HiSeq 2500	SRR2096496	platelet	26525104
GSE68086	Illumina HiSeq 2500	SRR2096497	platelet	26525104
GSE68086	Illumina HiSeq 2500	SRR2096498	platelet	26525104
GSE68086	Illumina HiSeq 2500	SRR2096499	platelet	26525104
GSE68086	Illumina HiSeq 2500	SRR2096500	platelet	26525104
GSE68086	Illumina HiSeq 2500	SRR2096501	platelet	26525104
GSE68086	Illumina HiSeq 2500	SRR2096511	platelet	26525104
GSE68086	Illumina HiSeq 2500	SRR2096502	platelet	26525104
GSE68086	Illumina HiSeq 2500	SRR2096503	platelet	26525104
GSE89843	Illumina HiSeq 2500	SRR5019905	platelet	26525104
GSE89843	Illumina HiSeq 2500	SRR5020359	platelet	26525104
GSE89843	Illumina HiSeq 2500	SRR5020358	platelet	26525104
GSE89843	Illumina HiSeq 2500	SRR5020357	platelet	26525104
GSE89843	Illumina HiSeq 2500	SRR5020356	platelet	26525104
GSE89843	Illumina HiSeq 2500	SRR5020355	platelet	26525104
GSE89843	Illumina HiSeq 2500	SRR5020354	platelet	26525104
GSE89843	Illumina HiSeq 2500	SRR5020353	platelet	26525104
GSE89843	Illumina HiSeq 2500	SRR5020352	platelet	26525104
GSE89843	Illumina HiSeq 2500	SRR5020351	platelet	26525104
GSE89843	Illumina HiSeq 2500	SRR5020350	platelet	26525104
GSE89843	Illumina HiSeq 2500	SRR5020349	platelet	26525104
GSE89843	Illumina HiSeq 2500	SRR5020348	platelet	26525104
GSE89843	Illumina HiSeq 2500	SRR5020347	platelet	26525104
GSE89843	Illumina HiSeq 2500	SRR5020346	platelet	26525104
GSE89843	Illumina HiSeq 2500	SRR5020345	platelet	26525104
GSE89843	Illumina HiSeq 2500	SRR5020344	platelet	26525104
GSE89843	Illumina HiSeq 2500	SRR5020343	platelet	26525104
GSE89843	Illumina HiSeq 2500	SRR5020371	platelet	26525104
GSE89843	Illumina HiSeq 2500	SRR5020379	platelet	26525104
GSE89843	Illumina HiSeq 2500	SRR5019904	platelet	26525104
GSE89843	Illumina HiSeq 2500	SRR5019903	platelet	26525104
GSE89843	Illumina HiSeq 2500	SRR5019902	platelet	26525104
GSE89843	Illumina HiSeq 2500	SRR5019901	platelet	26525104
GSE89843	Illumina HiSeq 2500	SRR5019900	platelet	28810146
GSE89843	Illumina HiSeq 2500	SRR5019899	platelet	28810146
GSE89843	Illumina HiSeq 2500	SRR5019898	platelet	28810146
GSE89843	Illumina HiSeq 2500	SRR5019897	platelet	28810146
GSE89843	Illumina HiSeq 2500	SRR5019896	platelet	28810146
GSE89843	Illumina HiSeq 2500	SRR5019895	platelet	28810146
GSE89843	Illumina HiSeq 2500	SRR5019894	platelet	28810146
GSE89843	Illumina HiSeq 2500	SRR5019893	platelet	28810146
GSE89843	Illumina HiSeq 2500	SRR5019892	platelet	28810146
GSE89843	Illumina HiSeq 2500	SRR5019891	platelet	28810146
GSE89843	Illumina HiSeq 2500	SRR5019890	platelet	28810146
GSE89843	Illumina HiSeq 2500	SRR5019889	platelet	28810146
GSE89843	Illumina HiSeq 2500	SRR5019888	platelet	28810146
GSE89843	Illumina HiSeq 2500	SRR5019887	platelet	28810146
GSE89843	Illumina HiSeq 2500	SRR5019886	platelet	28810146
GSE89843	Illumina HiSeq 2500	SRR5019885	platelet	28810146
GSE89843	Illumina HiSeq 2500	SRR5019884	platelet	28810146
GSE89843	Illumina HiSeq 2500	SRR5019883	platelet	28810146
GSE89843	Illumina HiSeq 2500	SRR5019914	platelet	28810146
GSE89843	Illumina HiSeq 2500	SRR5019913	platelet	28810146
GSE89843	Illumina HiSeq 2500	SRR5019912	platelet	28810146
GSE89843	Illumina HiSeq 2500	SRR5019907	platelet	28810146
GSE89843	Illumina HiSeq 2500	SRR5019906	platelet	28810146
GSE89843	Illumina HiSeq 2500	SRR5020336	platelet	28810146
GSE89843	Illumina HiSeq 2500	SRR5020335	platelet	28810146
GSE89843	Illumina HiSeq 2500	SRR5020334	platelet	28810146
GSE89843	Illumina HiSeq 2500	SRR5020333	platelet	28810146
GSE89843	Illumina HiSeq 2500	SRR5020332	platelet	28810146
GSE89843	Illumina HiSeq 2500	SRR5020331	platelet	28810146
GSE89843	Illumina HiSeq 2500	SRR5020330	platelet	28810146
GSE89843	Illumina HiSeq 2500	SRR5020329	platelet	28810146
GSE89843	Illumina HiSeq 2500	SRR5020328	platelet	28810146
GSE89843	Illumina HiSeq 2500	SRR5020327	platelet	28810146
GSE89843	Illumina HiSeq 2500	SRR5020326	platelet	28810146
GSE89843	Illumina HiSeq 2500	SRR5020325	platelet	28810146
GSE89843	Illumina HiSeq 2500	SRR5020324	platelet	28810146
GSE89843	Illumina HiSeq 2500	SRR5020323	platelet	28810146
GSE89843	Illumina HiSeq 2500	SRR5020322	platelet	28810146
GSE89843	Illumina HiSeq 2500	SRR5020321	platelet	28810146
GSE89843	Illumina HiSeq 2500	SRR5020320	platelet	28810146
GSE89843	Illumina HiSeq 2500	SRR5020319	platelet	28810146
GSE89843	Illumina HiSeq 2500	SRR5020318	platelet	28810146
GSE89843	Illumina HiSeq 2500	SRR5020317	platelet	28810146
GSE89843	Illumina HiSeq 2500	SRR5020313	platelet	28810146
GSE89843	Illumina HiSeq 2500	SRR5020312	platelet	28810146
GSE89843	Illumina HiSeq 2500	SRR5020311	platelet	28810146
GSE89843	Illumina HiSeq 2500	SRR5020316	platelet	28810146
GSE68086	Illumina HiSeq 2500	SRR1982699	platelet	28810146
GSE89843	Illumina HiSeq 2500	SRR5020374	platelet	28810146
GSE89843	Illumina HiSeq 2500	SRR5020370	platelet	28810146
GSE89843	Illumina HiSeq 2500	SRR5020369	platelet	28810146
GSE89843	Illumina HiSeq 2500	SRR5020368	platelet	28810146
GSE89843	Illumina HiSeq 2500	SRR5020367	platelet	28810146
GSE89843	Illumina HiSeq 2500	SRR5020366	platelet	28810146
GSE89843	Illumina HiSeq 2500	SRR5020365	platelet	28810146
GSE89843	Illumina HiSeq 2500	SRR5020364	platelet	28810146
GSE89843	Illumina HiSeq 2500	SRR5020363	platelet	28810146
GSE89843	Illumina HiSeq 2500	SRR5020362	platelet	28810146
GSE89843	Illumina HiSeq 2500	SRR5020361	platelet	28810146
GSE89843	Illumina HiSeq 2500	SRR5020360	platelet	28810146
GSE89843	Illumina HiSeq 2500	SRR5020308	platelet	28810146
GSE89843	Illumina HiSeq 2500	SRR5020307	platelet	28810146
GSE89843	Illumina HiSeq 2500	SRR5020306	platelet	28810146
GSE89843	Illumina HiSeq 2500	SRR5020305	platelet	28810146
GSE89843	Illumina HiSeq 2500	SRR5020304	platelet	28810146
GSE89843	Illumina HiSeq 2500	SRR5020303	platelet	28810146
GSE89843	Illumina HiSeq 2500	SRR5020302	platelet	28810146
GSE89843	Illumina HiSeq 2500	SRR5020301	platelet	28810146
GSE89843	Illumina HiSeq 2500	SRR5020300	platelet	28810146
GSE89843	Illumina HiSeq 2500	SRR5020299	platelet	28810146
GSE89843	Illumina HiSeq 2500	SRR5020298	platelet	28810146
GSE89843	Illumina HiSeq 2500	SRR5020297	platelet	26525104
GSE89843	Illumina HiSeq 2500	SRR5020296	platelet	28810146
GSE89843	Illumina HiSeq 2500	SRR5020295	platelet	28810146
GSE89843	Illumina HiSeq 2500	SRR5020294	platelet	28810146
GSE89843	Illumina HiSeq 2500	SRR5020293	platelet	28810146
GSE89843	Illumina HiSeq 2500	SRR5020292	platelet	28810146
GSE89843	Illumina HiSeq 2500	SRR5020291	platelet	28810146
GSE89843	Illumina HiSeq 2500	SRR5020290	platelet	28810146
GSE89843	Illumina HiSeq 2500	SRR5020289	platelet	28810146
GSE89843	Illumina HiSeq 2500	SRR5020288	platelet	28810146
GSE89843	Illumina HiSeq 2500	SRR5020287	platelet	28810146
GSE89843	Illumina HiSeq 2500	SRR5020286	platelet	28810146
GSE89843	Illumina HiSeq 2500	SRR5020285	platelet	28810146
GSE89843	Illumina HiSeq 2500	SRR5020284	platelet	28810146
GSE89843	Illumina HiSeq 2500	SRR5020283	platelet	28810146
GSE89843	Illumina HiSeq 2500	SRR5020342	platelet	28810146
GSE89843	Illumina HiSeq 2500	SRR5020341	platelet	28810146
GSE89843	Illumina HiSeq 2500	SRR5020340	platelet	28810146
GSE89843	Illumina HiSeq 2500	SRR5020339	platelet	28810146
GSE89843	Illumina HiSeq 2500	SRR5020338	platelet	28810146
GSE89843	Illumina HiSeq 2500	SRR5020337	platelet	28810146
GSE89843	Illumina HiSeq 2500	SRR5020232	platelet	28810146
GSE89843	Illumina HiSeq 2500	SRR5020231	platelet	28810146
GSE89843	Illumina HiSeq 2500	SRR5020230	platelet	28810146
GSE89843	Illumina HiSeq 2500	SRR5020229	platelet	28810146
GSE89843	Illumina HiSeq 2500	SRR5020228	platelet	28810146
GSE89843	Illumina HiSeq 2500	SRR5020227	platelet	28810146
GSE89843	Illumina HiSeq 2500	SRR5020226	platelet	28810146
GSE89843	Illumina HiSeq 2500	SRR5020223	platelet	28810146
GSE89843	Illumina HiSeq 2500	SRR5020222	platelet	28810146
GSE89843	Illumina HiSeq 2500	SRR5020221	platelet	28810146
GSE89843	Illumina HiSeq 2500	SRR5020282	platelet	28810146
GSE89843	Illumina HiSeq 2500	SRR5020281	platelet	28810146
GSE89843	Illumina HiSeq 2500	SRR5020280	platelet	28810146
GSE89843	Illumina HiSeq 2500	SRR5020279	platelet	28810146
GSE89843	Illumina HiSeq 2500	SRR5020278	platelet	28810146
GSE89843	Illumina HiSeq 2500	SRR5020277	platelet	28810146
GSE89843	Illumina HiSeq 2500	SRR5020276	platelet	28810146
GSE89843	Illumina HiSeq 2500	SRR5020275	platelet	28810146
GSE89843	Illumina HiSeq 2500	SRR5020274	platelet	28810146
GSE89843	Illumina HiSeq 2500	SRR5020273	platelet	28810146
GSE89843	Illumina HiSeq 2500	SRR5020272	platelet	28810146
GSE89843	Illumina HiSeq 2500	SRR5020271	platelet	28810146
GSE89843	Illumina HiSeq 2500	SRR5020270	platelet	28810146
GSE89843	Illumina HiSeq 2500	SRR5020269	platelet	28810146
GSE89843	Illumina HiSeq 2500	SRR5020268	platelet	28810146
GSE89843	Illumina HiSeq 2500	SRR5020267	platelet	28810146
GSE89843	Illumina HiSeq 2500	SRR5020266	platelet	28810146
GSE89843	Illumina HiSeq 2500	SRR5020265	platelet	28810146
GSE89843	Illumina HiSeq 2500	SRR5020264	platelet	28810146
GSE89843	Illumina HiSeq 2500	SRR5020263	platelet	28810146
GSE89843	Illumina HiSeq 2500	SRR5020262	platelet	28810146
GSE89843	Illumina HiSeq 2500	SRR5020261	platelet	28810146
GSE89843	Illumina HiSeq 2500	SRR5020260	platelet	28810146
GSE89843	Illumina HiSeq 2500	SRR5020259	platelet	28810146
GSE89843	Illumina HiSeq 2500	SRR5020258	platelet	28810146
GSE89843	Illumina HiSeq 2500	SRR5020257	platelet	28810146
GSE89843	Illumina HiSeq 2500	SRR5020256	platelet	28810146
GSE89843	Illumina HiSeq 2500	SRR5020255	platelet	28810146
GSE89843	Illumina HiSeq 2500	SRR5020254	platelet	28810146
GSE89843	Illumina HiSeq 2500	SRR5020253	platelet	28810146
GSE89843	Illumina HiSeq 2500	SRR5020315	platelet	28810146
GSE89843	Illumina HiSeq 2500	SRR5020314	platelet	28810146
GSE89843	Illumina HiSeq 2500	SRR5020310	platelet	28810146
GSE89843	Illumina HiSeq 2500	SRR5020309	platelet	28810146
GSE68086	Illumina HiSeq 2500	SRR1982712	platelet	28810146
GSE89843	Illumina HiSeq 2500	SRR5020204	platelet	28810146
GSE89843	Illumina HiSeq 2500	SRR5020203	platelet	28810146
GSE89843	Illumina HiSeq 2500	SRR5020202	platelet	28810146
GSE89843	Illumina HiSeq 2500	SRR5020201	platelet	28810146
GSE89843	Illumina HiSeq 2500	SRR5020200	platelet	28810146
GSE89843	Illumina HiSeq 2500	SRR5020199	platelet	28810146
GSE89843	Illumina HiSeq 2500	SRR5020196	platelet	28810146
GSE89843	Illumina HiSeq 2500	SRR5020195	platelet	28810146
GSE89843	Illumina HiSeq 2500	SRR5020194	platelet	28810146
GSE89843	Illumina HiSeq 2500	SRR5020188	platelet	28810146
GSE89843	Illumina HiSeq 2500	SRR5020187	platelet	28810146
GSE89843	Illumina HiSeq 2500	SRR5020193	platelet	28810146
GSE89843	Illumina HiSeq 2500	SRR5020192	platelet	28810146
GSE89843	Illumina HiSeq 2500	SRR5020191	platelet	28810146
GSE89843	Illumina HiSeq 2500	SRR5020190	platelet	28810146
GSE89843	Illumina HiSeq 2500	SRR5020252	platelet	28810146
GSE89843	Illumina HiSeq 2500	SRR5020251	platelet	28810146
GSE89843	Illumina HiSeq 2500	SRR5020250	platelet	28810146
GSE89843	Illumina HiSeq 2500	SRR5020249	platelet	28810146
GSE89843	Illumina HiSeq 2500	SRR5020248	platelet	28810146
GSE89843	Illumina HiSeq 2500	SRR5020247	platelet	28810146
GSE89843	Illumina HiSeq 2500	SRR5020246	platelet	28810146
GSE89843	Illumina HiSeq 2500	SRR5020245	platelet	28810146
GSE89843	Illumina HiSeq 2500	SRR5020244	platelet	26525104
GSE89843	Illumina HiSeq 2500	SRR5020243	platelet	28810146
GSE89843	Illumina HiSeq 2500	SRR5020242	platelet	28810146
GSE89843	Illumina HiSeq 2500	SRR5020241	platelet	28810146
GSE89843	Illumina HiSeq 2500	SRR5020240	platelet	28810146
GSE68086	Illumina HiSeq 2500	SRR2095014	platelet	28810146
GSE89843	Illumina HiSeq 2500	SRR5020237	platelet	28810146
GSE89843	Illumina HiSeq 2500	SRR5020236	platelet	28810146
GSE89843	Illumina HiSeq 2500	SRR5020235	platelet	28810146
GSE89843	Illumina HiSeq 2500	SRR5020234	platelet	28810146
GSE89843	Illumina HiSeq 2500	SRR5020233	platelet	28810146
GSE89843	Illumina HiSeq 2500	SRR5020465	platelet	28810146
GSE89843	Illumina HiSeq 2500	SRR5020464	platelet	28810146
GSE89843	Illumina HiSeq 2500	SRR5020463	platelet	28810146
GSE89843	Illumina HiSeq 2500	SRR5020173	platelet	28810146
GSE89843	Illumina HiSeq 2500	SRR5020462	platelet	28810146
GSE89843	Illumina HiSeq 2500	SRR5020172	platelet	28810146
GSE89843	Illumina HiSeq 2500	SRR5020171	platelet	28810146
GSE89843	Illumina HiSeq 2500	SRR5020461	platelet	28810146
GSE89843	Illumina HiSeq 2500	SRR5020460	platelet	28810146
GSE89843	Illumina HiSeq 2500	SRR5020170	platelet	28810146
GSE89843	Illumina HiSeq 2500	SRR5020459	platelet	28810146
GSE89843	Illumina HiSeq 2500	SRR5020169	platelet	28810146
GSE89843	Illumina HiSeq 2500	SRR5020458	platelet	28810146
GSE89843	Illumina HiSeq 2500	SRR5020457	platelet	28810146
GSE89843	Illumina HiSeq 2500	SRR5020168	platelet	28810146
GSE89843	Illumina HiSeq 2500	SRR5020456	platelet	28810146
GSE89843	Illumina HiSeq 2500	SRR5020167	platelet	28810146
GSE89843	Illumina HiSeq 2500	SRR5020455	platelet	28810146
GSE89843	Illumina HiSeq 2500	SRR5020454	platelet	26525104
GSE89843	Illumina HiSeq 2500	SRR5020166	platelet	28810146
GSE89843	Illumina HiSeq 2500	SRR5020453	platelet	28810146
GSE89843	Illumina HiSeq 2500	SRR5020165	platelet	28810146
GSE89843	Illumina HiSeq 2500	SRR5020452	platelet	28810146
GSE89843	Illumina HiSeq 2500	SRR5020164	platelet	28810146
GSE89843	Illumina HiSeq 2500	SRR5020451	platelet	28810146
GSE89843	Illumina HiSeq 2500	SRR5020450	platelet	28810146
GSE89843	Illumina HiSeq 2500	SRR5020449	platelet	28810146
GSE89843	Illumina HiSeq 2500	SRR5020163	platelet	28810146
GSE89843	Illumina HiSeq 2500	SRR5020448	platelet	28810146
GSE89843	Illumina HiSeq 2500	SRR5020447	platelet	28810146
GSE89843	Illumina HiSeq 2500	SRR5020162	platelet	28810146
GSE89843	Illumina HiSeq 2500	SRR5020444	platelet	28810146
GSE89843	Illumina HiSeq 2500	SRR5020443	platelet	28810146
GSE89843	Illumina HiSeq 2500	SRR5020442	platelet	28810146
GSE89843	Illumina HiSeq 2500	SRR5020161	platelet	28810146
GSE89843	Illumina HiSeq 2500	SRR5020496	platelet	28810146
GSE89843	Illumina HiSeq 2500	SRR5020495	platelet	28810146
GSE89843	Illumina HiSeq 2500	SRR5020157	platelet	28810146
GSE89843	Illumina HiSeq 2500	SRR5020494	platelet	28810146
GSE89843	Illumina HiSeq 2500	SRR5020156	platelet	28810146
GSE89843	Illumina HiSeq 2500	SRR5020493	platelet	28810146
GSE89843	Illumina HiSeq 2500	SRR5020220	platelet	28810146
GSE89843	Illumina HiSeq 2500	SRR5020492	platelet	28810146
GSE89843	Illumina HiSeq 2500	SRR5020219	platelet	28810146
GSE89843	Illumina HiSeq 2500	SRR5020491	platelet	28810146
GSE89843	Illumina HiSeq 2500	SRR5020490	platelet	28810146
GSE89843	Illumina HiSeq 2500	SRR5020489	platelet	28810146
GSE89843	Illumina HiSeq 2500	SRR5020218	platelet	28810146
GSE89843	Illumina HiSeq 2500	SRR5020488	platelet	28810146
GSE89843	Illumina HiSeq 2500	SRR5020487	platelet	28810146
GSE89843	Illumina HiSeq 2500	SRR5020486	platelet	28810146
GSE89843	Illumina HiSeq 2500	SRR5020485	platelet	28810146
GSE89843	Illumina HiSeq 2500	SRR5020484	platelet	28810146
GSE89843	Illumina HiSeq 2500	SRR5020217	platelet	28810146
GSE89843	Illumina HiSeq 2500	SRR5020483	platelet	28810146
GSE89843	Illumina HiSeq 2500	SRR5020216	platelet	28810146
GSE89843	Illumina HiSeq 2500	SRR5020378	platelet	28810146
GSE89843	Illumina HiSeq 2500	SRR5020215	platelet	28810146
GSE89843	Illumina HiSeq 2500	SRR5020480	platelet	28810146
GSE89843	Illumina HiSeq 2500	SRR5020479	platelet	28810146
GSE89843	Illumina HiSeq 2500	SRR5020214	platelet	28810146
GSE89843	Illumina HiSeq 2500	SRR5020478	platelet	28810146
GSE89843	Illumina HiSeq 2500	SRR5020213	platelet	28810146
GSE89843	Illumina HiSeq 2500	SRR5020477	platelet	28810146
GSE89843	Illumina HiSeq 2500	SRR5020476	platelet	28810146
GSE89843	Illumina HiSeq 2500	SRR5020475	platelet	28810146
GSE89843	Illumina HiSeq 2500	SRR5020210	platelet	28810146
GSE89843	Illumina HiSeq 2500	SRR5020209	platelet	28810146
GSE89843	Illumina HiSeq 2500	SRR5020208	platelet	28810146
GSE89843	Illumina HiSeq 2500	SRR5020410	platelet	28810146
GSE89843	Illumina HiSeq 2500	SRR5020207	platelet	28810146
GSE89843	Illumina HiSeq 2500	SRR5020140	platelet	28810146
GSE89843	Illumina HiSeq 2500	SRR5020139	platelet	28810146
GSE89843	Illumina HiSeq 2500	SRR5020138	platelet	28810146
GSE89843	Illumina HiSeq 2500	SRR5020386	platelet	28810146
GSE89843	Illumina HiSeq 2500	SRR5020137	platelet	28810146
GSE89843	Illumina HiSeq 2500	SRR5020136	platelet	28810146
GSE89843	Illumina HiSeq 2500	SRR5020135	platelet	28810146
GSE89843	Illumina HiSeq 2500	SRR5020134	platelet	28810146
GSE89843	Illumina HiSeq 2500	SRR5020133	platelet	28810146
GSE89843	Illumina HiSeq 2500	SRR5020376	platelet	28810146
GSE89843	Illumina HiSeq 2500	SRR5020132	platelet	28810146
GSE89843	Illumina HiSeq 2500	SRR5020383	platelet	28810146
GSE89843	Illumina HiSeq 2500	SRR5020131	platelet	28810146
GSE89843	Illumina HiSeq 2500	SRR5020130	platelet	28810146
GSE89843	Illumina HiSeq 2500	SRR5020124	platelet	28810146
GSE89843	Illumina HiSeq 2500	SRR5020123	platelet	28810146
GSE89843	Illumina HiSeq 2500	SRR5020380	platelet	28810146
GSE89843	Illumina HiSeq 2500	SRR5020373	platelet	28810146
GSE89843	Illumina HiSeq 2500	SRR5020129	platelet	28810146
GSE89843	Illumina HiSeq 2500	SRR5020128	platelet	28810146
GSE89843	Illumina HiSeq 2500	SRR5020372	platelet	28810146
GSE89843	Illumina HiSeq 2500	SRR5020127	platelet	28810146
GSE89843	Illumina HiSeq 2500	SRR5020441	platelet	28810146
GSE89843	Illumina HiSeq 2500	SRR5020126	platelet	28810146
GSE89843	Illumina HiSeq 2500	SRR5020446	platelet	28810146
GSE89843	Illumina HiSeq 2500	SRR5020189	platelet	28810146
GSE89843	Illumina HiSeq 2500	SRR5020445	platelet	28810146
GSE89843	Illumina HiSeq 2500	SRR5020440	platelet	28810146
GSE89843	Illumina HiSeq 2500	SRR5020186	platelet	28810146
GSE89843	Illumina HiSeq 2500	SRR5020439	platelet	28810146
GSE89843	Illumina HiSeq 2500	SRR5020438	platelet	28810146
GSE89843	Illumina HiSeq 2500	SRR5020437	platelet	28810146
GSE89843	Illumina HiSeq 2500	SRR5020436	platelet	28810146
GSE89843	Illumina HiSeq 2500	SRR5020435	platelet	28810146
GSE89843	Illumina HiSeq 2500	SRR5020434	platelet	28810146
GSE89843	Illumina HiSeq 2500	SRR5020433	platelet	28810146
GSE89843	Illumina HiSeq 2500	SRR5020185	platelet	28810146
GSE89843	Illumina HiSeq 2500	SRR5020432	platelet	28810146
GSE89843	Illumina HiSeq 2500	SRR5020431	platelet	28810146
GSE89843	Illumina HiSeq 2500	SRR5020430	platelet	28810146
GSE89843	Illumina HiSeq 2500	SRR5020184	platelet	28810146
GSE89843	Illumina HiSeq 2500	SRR5020183	platelet	28810146
GSE89843	Illumina HiSeq 2500	SRR5020429	platelet	28810146
GSE89843	Illumina HiSeq 2500	SRR5020182	platelet	28810146
GSE89843	Illumina HiSeq 2500	SRR5020181	platelet	28810146
GSE89843	Illumina HiSeq 2500	SRR5020428	platelet	28810146
GSE89843	Illumina HiSeq 2500	SRR5020427	platelet	28810146
GSE89843	Illumina HiSeq 2500	SRR5020426	platelet	28810146
GSE89843	Illumina HiSeq 2500	SRR5020425	platelet	28810146
GSE89843	Illumina HiSeq 2500	SRR5020424	platelet	28810146
GSE89843	Illumina HiSeq 2500	SRR5020423	platelet	28810146
GSE89843	Illumina HiSeq 2500	SRR5020422	platelet	28810146
GSE89843	Illumina HiSeq 2500	SRR5020421	platelet	28810146
GSE89843	Illumina HiSeq 2500	SRR5020420	platelet	28810146
GSE89843	Illumina HiSeq 2500	SRR5020419	platelet	28810146
GSE89843	Illumina HiSeq 2500	SRR5020180	platelet	28810146
GSE89843	Illumina HiSeq 2500	SRR5020418	platelet	28810146
GSE89843	Illumina HiSeq 2500	SRR5020417	platelet	28810146
GSE89843	Illumina HiSeq 2500	SRR5020179	platelet	28810146
GSE89843	Illumina HiSeq 2500	SRR5020225	platelet	28810146
GSE89843	Illumina HiSeq 2500	SRR5020178	platelet	28810146
GSE89843	Illumina HiSeq 2500	SRR5020206	platelet	28810146
GSE89843	Illumina HiSeq 2500	SRR5020474	platelet	28810146
GSE89843	Illumina HiSeq 2500	SRR5020177	platelet	28810146
GSE89843	Illumina HiSeq 2500	SRR5020473	platelet	28810146
GSE89843	Illumina HiSeq 2500	SRR5020472	platelet	28810146
GSE89843	Illumina HiSeq 2500	SRR5020176	platelet	28810146
GSE89843	Illumina HiSeq 2500	SRR5020471	platelet	28810146
GSE89843	Illumina HiSeq 2500	SRR5020470	platelet	28810146
GSE89843	Illumina HiSeq 2500	SRR5020469	platelet	28810146
GSE89843	Illumina HiSeq 2500	SRR5020466	platelet	28810146
GSE89843	Illumina HiSeq 2500	SRR5020175	platelet	28810146
GSE89843	Illumina HiSeq 2500	SRR5020174	platelet	28810146
GSE89843	Illumina HiSeq 2500	SRR5020067	platelet	28810146
GSE89843	Illumina HiSeq 2500	SRR5020066	platelet	28810146
GSE89843	Illumina HiSeq 2500	SRR5020065	platelet	28810146
GSE89843	Illumina HiSeq 2500	SRR5020060	platelet	28810146
GSE89843	Illumina HiSeq 2500	SRR5020059	platelet	28810146
GSE89843	Illumina HiSeq 2500	SRR5020058	platelet	28810146
GSE89843	Illumina HiSeq 2500	SRR5020057	platelet	28810146
GSE89843	Illumina HiSeq 2500	SRR5020056	platelet	28810146
GSE89843	Illumina HiSeq 2500	SRR5020055	platelet	28810146
GSE89843	Illumina HiSeq 2500	SRR5020054	platelet	28810146
GSE89843	Illumina HiSeq 2500	SRR5020053	platelet	28810146
GSE89843	Illumina HiSeq 2500	SRR5020052	platelet	28810146
GSE89843	Illumina HiSeq 2500	SRR5020051	platelet	28810146
GSE89843	Illumina HiSeq 2500	SRR5020050	platelet	28810146
GSE89843	Illumina HiSeq 2500	SRR5020049	platelet	28810146
GSE89843	Illumina HiSeq 2500	SRR5020048	platelet	28810146
GSE89843	Illumina HiSeq 2500	SRR5020047	platelet	28810146
GSE89843	Illumina HiSeq 2500	SRR5020046	platelet	28810146
GSE89843	Illumina HiSeq 2500	SRR5020045	platelet	28810146
GSE89843	Illumina HiSeq 2500	SRR5020044	platelet	28810146
GSE89843	Illumina HiSeq 2500	SRR5020197	platelet	28810146
GSE89843	Illumina HiSeq 2500	SRR5020043	platelet	28810146
GSE89843	Illumina HiSeq 2500	SRR5020040	platelet	28810146
GSE89843	Illumina HiSeq 2500	SRR5020039	platelet	28810146
GSE89843	Illumina HiSeq 2500	SRR5020038	platelet	28810146
GSE89843	Illumina HiSeq 2500	SRR5020037	platelet	28810146
GSE89843	Illumina HiSeq 2500	SRR5020036	platelet	28810146
GSE89843	Illumina HiSeq 2500	SRR5020035	platelet	28810146
GSE89843	Illumina HiSeq 2500	SRR5020034	platelet	28810146
GSE89843	Illumina HiSeq 2500	SRR5020033	platelet	28810146
GSE89843	Illumina HiSeq 2500	SRR5020093	platelet	28810146
GSE89843	Illumina HiSeq 2500	SRR5020092	platelet	28810146
GSE89843	Illumina HiSeq 2500	SRR5020091	platelet	28810146
GSE89843	Illumina HiSeq 2500	SRR5020090	platelet	28810146
GSE89843	Illumina HiSeq 2500	SRR5020089	platelet	28810146
GSE89843	Illumina HiSeq 2500	SRR5020087	platelet	28810146
GSE89843	Illumina HiSeq 2500	SRR5020088	platelet	28810146
GSE89843	Illumina HiSeq 2500	SRR5020086	platelet	28810146
GSE89843	Illumina HiSeq 2500	SRR5020085	platelet	28810146
GSE89843	Illumina HiSeq 2500	SRR5020084	platelet	28810146
GSE89843	Illumina HiSeq 2500	SRR5020082	platelet	28810146
GSE89843	Illumina HiSeq 2500	SRR5020083	platelet	28810146
GSE89843	Illumina HiSeq 2500	SRR5020080	platelet	28810146
GSE89843	Illumina HiSeq 2500	SRR5020079	platelet	28810146
GSE89843	Illumina HiSeq 2500	SRR5020078	platelet	28810146
GSE89843	Illumina HiSeq 2500	SRR5020076	platelet	28810146
GSE89843	Illumina HiSeq 2500	SRR5020077	platelet	28810146
GSE89843	Illumina HiSeq 2500	SRR5020074	platelet	28810146
GSE89843	Illumina HiSeq 2500	SRR5020075	platelet	28810146
GSE89843	Illumina HiSeq 2500	SRR5020073	platelet	28810146
GSE89843	Illumina HiSeq 2500	SRR5020071	platelet	28810146
GSE89843	Illumina HiSeq 2500	SRR5020072	platelet	28810146
GSE89843	Illumina HiSeq 2500	SRR5020070	platelet	28810146
GSE89843	Illumina HiSeq 2500	SRR5020069	platelet	28810146
GSE89843	Illumina HiSeq 2500	SRR5020068	platelet	28810146
GSE89843	Illumina HiSeq 2500	SRR5020064	platelet	28810146
GSE89843	Illumina HiSeq 2500	SRR5020063	platelet	28810146
GSE89843	Illumina HiSeq 2500	SRR5020062	platelet	28810146
GSE89843	Illumina HiSeq 2500	SRR5020061	platelet	28810146
GSE89843	Illumina HiSeq 2500	SRR5020125	platelet	28810146
GSE89843	Illumina HiSeq 2500	SRR5020122	platelet	28810146
GSE89843	Illumina HiSeq 2500	SRR5020121	platelet	28810146
GSE89843	Illumina HiSeq 2500	SRR5020120	platelet	28810146
GSE89843	Illumina HiSeq 2500	SRR5020119	platelet	28810146
GSE89843	Illumina HiSeq 2500	SRR5020118	platelet	28810146
GSE89843	Illumina HiSeq 2500	SRR5020409	platelet	28810146
GSE89843	Illumina HiSeq 2500	SRR5020117	platelet	28810146
GSE89843	Illumina HiSeq 2500	SRR5020408	platelet	28810146
GSE89843	Illumina HiSeq 2500	SRR5020407	platelet	28810146
GSE89843	Illumina HiSeq 2500	SRR5020116	platelet	28810146
GSE89843	Illumina HiSeq 2500	SRR5020115	platelet	28810146
GSE89843	Illumina HiSeq 2500	SRR5020404	platelet	28810146
GSE89843	Illumina HiSeq 2500	SRR5020114	platelet	28810146
GSE89843	Illumina HiSeq 2500	SRR5020113	platelet	28810146
GSE89843	Illumina HiSeq 2500	SRR5020112	platelet	28810146
GSE89843	Illumina HiSeq 2500	SRR5020239	platelet	28810146
GSE89843	Illumina HiSeq 2500	SRR5020111	platelet	28810146
GSE89843	Illumina HiSeq 2500	SRR5020401	platelet	28810146
GSE89843	Illumina HiSeq 2500	SRR5020110	platelet	28810146
GSE89843	Illumina HiSeq 2500	SRR5020109	platelet	28810146
GSE89843	Illumina HiSeq 2500	SRR5020108	platelet	28810146
GSE89843	Illumina HiSeq 2500	SRR5020400	platelet	28810146
GSE89843	Illumina HiSeq 2500	SRR5020399	platelet	28810146
GSE89843	Illumina HiSeq 2500	SRR5020398	platelet	28810146
GSE89843	Illumina HiSeq 2500	SRR5020397	platelet	28810146
GSE89843	Illumina HiSeq 2500	SRR5020107	platelet	28810146
GSE89843	Illumina HiSeq 2500	SRR5020106	platelet	28810146
GSE89843	Illumina HiSeq 2500	SRR5020394	platelet	28810146
GSE89843	Illumina HiSeq 2500	SRR5020105	platelet	28810146
GSE89843	Illumina HiSeq 2500	SRR5020159	platelet	28810146
GSE89843	Illumina HiSeq 2500	SRR5020104	platelet	28810146
GSE89843	Illumina HiSeq 2500	SRR5020391	platelet	28810146
GSE89843	Illumina HiSeq 2500	SRR5020103	platelet	28810146
GSE89843	Illumina HiSeq 2500	SRR5020102	platelet	28810146
GSE89843	Illumina HiSeq 2500	SRR5020101	platelet	28810146
GSE89843	Illumina HiSeq 2500	SRR5020094	platelet	28810146
GSE89843	Illumina HiSeq 2500	SRR5020100	platelet	28810146
GSE89843	Illumina HiSeq 2500	SRR5020099	platelet	28810146
GSE89843	Illumina HiSeq 2500	SRR5020390	platelet	28810146
GSE89843	Illumina HiSeq 2500	SRR5020098	platelet	28810146
GSE89843	Illumina HiSeq 2500	SRR5020097	platelet	28810146
GSE89843	Illumina HiSeq 2500	SRR5020096	platelet	28810146
GSE89843	Illumina HiSeq 2500	SRR5020389	platelet	28810146
GSE89843	Illumina HiSeq 2500	SRR5020095	platelet	28810146
GSE89843	Illumina HiSeq 2500	SRR5020155	platelet	28810146
GSE89843	Illumina HiSeq 2500	SRR5020154	platelet	28810146
GSE89843	Illumina HiSeq 2500	SRR5020153	platelet	28810146
GSE89843	Illumina HiSeq 2500	SRR5020152	platelet	28810146
GSE89843	Illumina HiSeq 2500	SRR5020158	platelet	28810146
GSE89843	Illumina HiSeq 2500	SRR5020151	platelet	28810146
GSE89843	Illumina HiSeq 2500	SRR5020150	platelet	28810146
GSE89843	Illumina HiSeq 2500	SRR5020149	platelet	28810146
GSE89843	Illumina HiSeq 2500	SRR5020388	platelet	28810146
GSE89843	Illumina HiSeq 2500	SRR5020146	platelet	28810146
GSE89843	Illumina HiSeq 2500	SRR5020387	platelet	28810146
GSE89843	Illumina HiSeq 2500	SRR5020482	platelet	28810146
GSE89843	Illumina HiSeq 2500	SRR5020141	platelet	28810146
GSE89843	Illumina HiSeq 2500	SRR5019916	platelet	28810146
GSE89843	Illumina HiSeq 2500	SRR5019911	platelet	28810146
GSE89843	Illumina HiSeq 2500	SRR5019915	platelet	28810146
GSE89843	Illumina HiSeq 2500	SRR5020617	platelet	28810146
GSE89843	Illumina HiSeq 2500	SRR5019910	platelet	28810146
GSE89843	Illumina HiSeq 2500	SRR5019908	platelet	28810146
GSE89843	Illumina HiSeq 2500	SRR5019909	platelet	28810146
GSE89843	Illumina HiSeq 2500	SRR5020616	platelet	28810146
GSE89843	Illumina HiSeq 2500	SRR5019973	platelet	28810146
GSE89843	Illumina HiSeq 2500	SRR5019972	platelet	28810146
GSE89843	Illumina HiSeq 2500	SRR5020615	platelet	28810146
GSE89843	Illumina HiSeq 2500	SRR5019967	platelet	28810146
GSE89843	Illumina HiSeq 2500	SRR5019968	platelet	28810146
GSE89843	Illumina HiSeq 2500	SRR5019966	platelet	28810146
GSE89843	Illumina HiSeq 2500	SRR5020614	platelet	28810146
GSE89843	Illumina HiSeq 2500	SRR5019964	platelet	28810146
GSE89843	Illumina HiSeq 2500	SRR5019965	platelet	28810146
GSE89843	Illumina HiSeq 2500	SRR5019963	platelet	28810146
GSE89843	Illumina HiSeq 2500	SRR5019961	platelet	28810146
GSE89843	Illumina HiSeq 2500	SRR5020613	platelet	28810146
GSE89843	Illumina HiSeq 2500	SRR5019962	platelet	28810146
GSE89843	Illumina HiSeq 2500	SRR5019960	platelet	28810146
GSE89843	Illumina HiSeq 2500	SRR5020612	platelet	28810146
GSE89843	Illumina HiSeq 2500	SRR5019957	platelet	28810146
GSE89843	Illumina HiSeq 2500	SRR5019959	platelet	28810146
GSE89843	Illumina HiSeq 2500	SRR5019958	platelet	28810146
GSE89843	Illumina HiSeq 2500	SRR5020212	platelet	28810146
GSE89843	Illumina HiSeq 2500	SRR5019956	platelet	28810146
GSE89843	Illumina HiSeq 2500	SRR5019954	platelet	28810146
GSE89843	Illumina HiSeq 2500	SRR5019955	platelet	28810146
GSE89843	Illumina HiSeq 2500	SRR5020609	platelet	28810146
GSE89843	Illumina HiSeq 2500	SRR5019953	platelet	28810146
GSE89843	Illumina HiSeq 2500	SRR5019952	platelet	28810146
GSE89843	Illumina HiSeq 2500	SRR5020608	platelet	28810146
GSE89843	Illumina HiSeq 2500	SRR5019950	platelet	28810146
GSE89843	Illumina HiSeq 2500	SRR5019951	platelet	28810146
GSE89843	Illumina HiSeq 2500	SRR5019949	platelet	28810146
GSE89843	Illumina HiSeq 2500	SRR5019948	platelet	28810146
GSE89843	Illumina HiSeq 2500	SRR5020648	platelet	28810146
GSE89843	Illumina HiSeq 2500	SRR5020649	platelet	28810146
GSE89843	Illumina HiSeq 2500	SRR5019947	platelet	28810146
GSE89843	Illumina HiSeq 2500	SRR5019945	platelet	28810146
GSE89843	Illumina HiSeq 2500	SRR5019946	platelet	28810146
GSE89843	Illumina HiSeq 2500	SRR5019944	platelet	28810146
GSE89843	Illumina HiSeq 2500	SRR5019943	platelet	28810146
GSE89843	Illumina HiSeq 2500	SRR5019942	platelet	28810146
GSE89843	Illumina HiSeq 2500	SRR5020647	platelet	28810146
GSE89843	Illumina HiSeq 2500	SRR5020646	platelet	28810146
GSE89843	Illumina HiSeq 2500	SRR5019941	platelet	28810146
GSE89843	Illumina HiSeq 2500	SRR5020645	platelet	28810146
GSE89843	Illumina HiSeq 2500	SRR5020000	platelet	28810146
GSE89843	Illumina HiSeq 2500	SRR5019999	platelet	28810146
GSE89843	Illumina HiSeq 2500	SRR5019998	platelet	28810146
GSE89843	Illumina HiSeq 2500	SRR5019996	platelet	28810146
GSE89843	Illumina HiSeq 2500	SRR5019997	platelet	28810146
GSE89843	Illumina HiSeq 2500	SRR5019994	platelet	28810146
GSE89843	Illumina HiSeq 2500	SRR5019993	platelet	28810146
GSE89843	Illumina HiSeq 2500	SRR5020644	platelet	28810146
GSE89843	Illumina HiSeq 2500	SRR5020643	platelet	28810146
GSE89843	Illumina HiSeq 2500	SRR5019992	platelet	28810146
GSE89843	Illumina HiSeq 2500	SRR5020642	platelet	28810146
GSE89843	Illumina HiSeq 2500	SRR5020641	platelet	28810146
GSE89843	Illumina HiSeq 2500	SRR5019991	platelet	28810146
GSE89843	Illumina HiSeq 2500	SRR5019989	platelet	28810146
GSE89843	Illumina HiSeq 2500	SRR5019990	platelet	28810146
GSE89843	Illumina HiSeq 2500	SRR5019988	platelet	28810146
GSE89843	Illumina HiSeq 2500	SRR5019987	platelet	28810146
GSE89843	Illumina HiSeq 2500	SRR5019986	platelet	28810146
GSE89843	Illumina HiSeq 2500	SRR5019985	platelet	28810146
GSE89843	Illumina HiSeq 2500	SRR5020640	platelet	28810146
GSE89843	Illumina HiSeq 2500	SRR5019984	platelet	28810146
GSE89843	Illumina HiSeq 2500	SRR5020639	platelet	28810146
GSE89843	Illumina HiSeq 2500	SRR5019983	platelet	28810146
GSE89843	Illumina HiSeq 2500	SRR5019982	platelet	28810146
GSE89843	Illumina HiSeq 2500	SRR5020638	platelet	28810146
GSE89843	Illumina HiSeq 2500	SRR5020526	platelet	28810146
GSE89843	Illumina HiSeq 2500	SRR5019981	platelet	28810146
GSE89843	Illumina HiSeq 2500	SRR5019979	platelet	28810146
GSE89843	Illumina HiSeq 2500	SRR5019980	platelet	28810146
GSE89843	Illumina HiSeq 2500	SRR5019978	platelet	28810146
GSE89843	Illumina HiSeq 2500	SRR5019976	platelet	28810146
GSE89843	Illumina HiSeq 2500	SRR5019977	platelet	28810146
GSE89843	Illumina HiSeq 2500	SRR5020385	platelet	28810146
GSE89843	Illumina HiSeq 2500	SRR5020525	platelet	28810146
GSE89843	Illumina HiSeq 2500	SRR5019971	platelet	28810146
GSE89843	Illumina HiSeq 2500	SRR5019970	platelet	28810146
GSE89843	Illumina HiSeq 2500	SRR5019969	platelet	28810146
GSE89843	Illumina HiSeq 2500	SRR5019975	platelet	28810146
GSE89843	Illumina HiSeq 2500	SRR5019974	platelet	28810146
GSE89843	Illumina HiSeq 2500	SRR5020032	platelet	28810146
GSE89843	Illumina HiSeq 2500	SRR5020031	platelet	28810146
GSE89843	Illumina HiSeq 2500	SRR5020030	platelet	28810146
GSE89843	Illumina HiSeq 2500	SRR5020029	platelet	28810146
GSE89843	Illumina HiSeq 2500	SRR5020028	platelet	28810146
GSE89843	Illumina HiSeq 2500	SRR5020027	platelet	28810146
GSE89843	Illumina HiSeq 2500	SRR5020025	platelet	28810146
GSE89843	Illumina HiSeq 2500	SRR5020026	platelet	28810146
GSE89843	Illumina HiSeq 2500	SRR5020024	platelet	28810146
GSE89843	Illumina HiSeq 2500	SRR5020023	platelet	28810146
GSE89843	Illumina HiSeq 2500	SRR5020022	platelet	28810146
GSE89843	Illumina HiSeq 2500	SRR5020021	platelet	28810146
GSE89843	Illumina HiSeq 2500	SRR5020020	platelet	28810146
GSE89843	Illumina HiSeq 2500	SRR5020019	platelet	28810146
GSE89843	Illumina HiSeq 2500	SRR5020018	platelet	28810146
GSE89843	Illumina HiSeq 2500	SRR5020382	platelet	28810146
GSE89843	Illumina HiSeq 2500	SRR5020013	platelet	28810146
GSE89843	Illumina HiSeq 2500	SRR5020012	platelet	28810146
GSE89843	Illumina HiSeq 2500	SRR5020011	platelet	28810146
GSE89843	Illumina HiSeq 2500	SRR5020010	platelet	28810146
GSE89843	Illumina HiSeq 2500	SRR5020009	platelet	28810146
GSE89843	Illumina HiSeq 2500	SRR5020008	platelet	28810146
GSE89843	Illumina HiSeq 2500	SRR5020007	platelet	28810146
GSE89843	Illumina HiSeq 2500	SRR5020006	platelet	28810146
GSE89843	Illumina HiSeq 2500	SRR5020005	platelet	28810146
GSE89843	Illumina HiSeq 2500	SRR5020004	platelet	28810146
GSE89843	Illumina HiSeq 2500	SRR5020003	platelet	28810146
GSE89843	Illumina HiSeq 2500	SRR5020002	platelet	28810146
GSE89843	Illumina HiSeq 2500	SRR5020001	platelet	28810146
GSE89843	Illumina HiSeq 2500	SRR5020416	platelet	28810146
GSE89843	Illumina HiSeq 2500	SRR5020597	platelet	28810146
GSE89843	Illumina HiSeq 2500	SRR5020596	platelet	28810146
GSE89843	Illumina HiSeq 2500	SRR5020595	platelet	28810146
GSE89843	Illumina HiSeq 2500	SRR5020594	platelet	28810146
GSE89843	Illumina HiSeq 2500	SRR5020593	platelet	28810146
GSE89843	Illumina HiSeq 2500	SRR5020592	platelet	28810146
GSE89843	Illumina HiSeq 2500	SRR5020591	platelet	28810146
GSE89843	Illumina HiSeq 2500	SRR5020414	platelet	28810146
GSE89843	Illumina HiSeq 2500	SRR5020412	platelet	28810146
GSE89843	Illumina HiSeq 2500	SRR5020584	platelet	28810146
GSE89843	Illumina HiSeq 2500	SRR5020583	platelet	28810146
GSE89843	Illumina HiSeq 2500	SRR5020582	platelet	28810146
GSE89843	Illumina HiSeq 2500	SRR5020579	platelet	28810146
GSE89843	Illumina HiSeq 2500	SRR5020578	platelet	28810146
GSE89843	Illumina HiSeq 2500	SRR5020468	platelet	28810146
GSE89843	Illumina HiSeq 2500	SRR5020575	platelet	28810146
GSE89843	Illumina HiSeq 2500	SRR5020574	platelet	28810146
GSE89843	Illumina HiSeq 2500	SRR5020573	platelet	28810146
GSE89843	Illumina HiSeq 2500	SRR5020570	platelet	28810146
GSE89843	Illumina HiSeq 2500	SRR5020042	platelet	28810146
GSE89843	Illumina HiSeq 2500	SRR5020565	platelet	28810146
GSE89843	Illumina HiSeq 2500	SRR5020637	platelet	28810146
GSE89843	Illumina HiSeq 2500	SRR5020636	platelet	28810146
GSE89843	Illumina HiSeq 2500	SRR5020635	platelet	28810146
GSE89843	Illumina HiSeq 2500	SRR5020634	platelet	28810146
GSE89843	Illumina HiSeq 2500	SRR5020633	platelet	28810146
GSE89843	Illumina HiSeq 2500	SRR5020632	platelet	28810146
GSE89843	Illumina HiSeq 2500	SRR5020631	platelet	28810146
GSE89843	Illumina HiSeq 2500	SRR5020630	platelet	28810146
GSE89843	Illumina HiSeq 2500	SRR5020629	platelet	28810146
GSE89843	Illumina HiSeq 2500	SRR5020628	platelet	28810146
GSE89843	Illumina HiSeq 2500	SRR5020627	platelet	28810146
GSE89843	Illumina HiSeq 2500	SRR5020626	platelet	28810146
GSE89843	Illumina HiSeq 2500	SRR5020625	platelet	28810146
GSE89843	Illumina HiSeq 2500	SRR5020624	platelet	28810146
GSE89843	Illumina HiSeq 2500	SRR5019940	platelet	28810146
GSE89843	Illumina HiSeq 2500	SRR5019939	platelet	28810146
GSE89843	Illumina HiSeq 2500	SRR5019936	platelet	28810146
GSE89843	Illumina HiSeq 2500	SRR5020623	platelet	28810146
GSE89843	Illumina HiSeq 2500	SRR5019938	platelet	28810146
GSE89843	Illumina HiSeq 2500	SRR5019937	platelet	28810146
GSE89843	Illumina HiSeq 2500	SRR5019935	platelet	28810146
GSE89843	Illumina HiSeq 2500	SRR5019932	platelet	28810146
GSE89843	Illumina HiSeq 2500	SRR5020622	platelet	28810146
GSE89843	Illumina HiSeq 2500	SRR5019934	platelet	28810146
GSE89843	Illumina HiSeq 2500	SRR5019933	platelet	28810146
GSE89843	Illumina HiSeq 2500	SRR5019931	platelet	28810146
GSE89843	Illumina HiSeq 2500	SRR5020621	platelet	28810146
GSE89843	Illumina HiSeq 2500	SRR5019928	platelet	28810146
GSE89843	Illumina HiSeq 2500	SRR5019930	platelet	28810146
GSE89843	Illumina HiSeq 2500	SRR5019929	platelet	28810146
GSE89843	Illumina HiSeq 2500	SRR5019927	platelet	28810146
GSE89843	Illumina HiSeq 2500	SRR5019924	platelet	28810146
GSE89843	Illumina HiSeq 2500	SRR5020620	platelet	28810146
GSE89843	Illumina HiSeq 2500	SRR5019926	platelet	28810146
GSE89843	Illumina HiSeq 2500	SRR5019925	platelet	28810146
GSE89843	Illumina HiSeq 2500	SRR5019923	platelet	28810146
GSE89843	Illumina HiSeq 2500	SRR5020619	platelet	28810146
GSE89843	Illumina HiSeq 2500	SRR5019920	platelet	28810146
GSE89843	Illumina HiSeq 2500	SRR5019922	platelet	28810146
GSE89843	Illumina HiSeq 2500	SRR5019921	platelet	28810146
GSE89843	Illumina HiSeq 2500	SRR5019919	platelet	28810146
GSE89843	Illumina HiSeq 2500	SRR5020618	platelet	28810146
GSE89843	Illumina HiSeq 2500	SRR5019918	platelet	28810146
GSE89843	Illumina HiSeq 2500	SRR5020505	platelet	28810146
GSE89843	Illumina HiSeq 2500	SRR5020504	platelet	28810146
GSE89843	Illumina HiSeq 2500	SRR5020503	platelet	28810146
GSE89843	Illumina HiSeq 2500	SRR5020502	platelet	28810146
GSE89843	Illumina HiSeq 2500	SRR5020501	platelet	28810146
GSE89843	Illumina HiSeq 2500	SRR5020500	platelet	28810146
GSE89843	Illumina HiSeq 2500	SRR5020499	platelet	28810146
GSE89843	Illumina HiSeq 2500	SRR5020498	platelet	28810146
GSE89843	Illumina HiSeq 2500	SRR5020497	platelet	28810146
GSE89843	Illumina HiSeq 2500	SRR5020564	platelet	28810146
GSE89843	Illumina HiSeq 2500	SRR5020563	platelet	28810146
GSE89843	Illumina HiSeq 2500	SRR5020562	platelet	28810146
GSE89843	Illumina HiSeq 2500	SRR5020561	platelet	28810146
GSE89843	Illumina HiSeq 2500	SRR5020560	platelet	28810146
GSE89843	Illumina HiSeq 2500	SRR5020559	platelet	28810146
GSE89843	Illumina HiSeq 2500	SRR5020558	platelet	28810146
GSE89843	Illumina HiSeq 2500	SRR5020557	platelet	28810146
GSE89843	Illumina HiSeq 2500	SRR5020556	platelet	28810146
GSE89843	Illumina HiSeq 2500	SRR5020555	platelet	28810146
GSE89843	Illumina HiSeq 2500	SRR5020406	platelet	28810146
GSE89843	Illumina HiSeq 2500	SRR5020552	platelet	28810146
GSE89843	Illumina HiSeq 2500	SRR5020551	platelet	28810146
GSE89843	Illumina HiSeq 2500	SRR5020550	platelet	28810146
GSE89843	Illumina HiSeq 2500	SRR5020542	platelet	28810146
GSE89843	Illumina HiSeq 2500	SRR5020547	platelet	28810146
GSE89843	Illumina HiSeq 2500	SRR5020546	platelet	28810146
GSE89843	Illumina HiSeq 2500	SRR5020545	platelet	28810146
GSE89843	Illumina HiSeq 2500	SRR5020544	platelet	28810146
GSE89843	Illumina HiSeq 2500	SRR5020543	platelet	28810146
GSE89843	Illumina HiSeq 2500	SRR5020541	platelet	28810146
GSE89843	Illumina HiSeq 2500	SRR5020540	platelet	28810146
GSE89843	Illumina HiSeq 2500	SRR5020539	platelet	28810146
GSE89843	Illumina HiSeq 2500	SRR5020403	platelet	28810146
GSE89843	Illumina HiSeq 2500	SRR5020534	platelet	28810146
GSE89843	Illumina HiSeq 2500	SRR5020533	platelet	28810146
GSE89843	Illumina HiSeq 2500	SRR5020396	platelet	28810146
GSE89843	Illumina HiSeq 2500	SRR5020393	platelet	28810146
GSE89843	Illumina HiSeq 2500	SRR5019995	platelet	28810146
GSE89843	Illumina HiSeq 2500	SRR5020081	platelet	28810146
GSE89843	Illumina HiSeq 2500	SRR5020524	platelet	28810146
GSE89843	Illumina HiSeq 2500	SRR5020523	platelet	28810146
GSE89843	Illumina HiSeq 2500	SRR5020520	platelet	28810146
GSE89843	Illumina HiSeq 2500	SRR5020521	platelet	28810146
GSE89843	Illumina HiSeq 2500	SRR5020522	platelet	28810146
GSE89843	Illumina HiSeq 2500	SRR5020514	platelet	28810146
GSE89843	Illumina HiSeq 2500	SRR5020515	platelet	28810146
GSE89843	Illumina HiSeq 2500	SRR5020517	platelet	28810146
GSE89843	Illumina HiSeq 2500	SRR5020516	platelet	28810146
GSE89843	Illumina HiSeq 2500	SRR5020518	platelet	28810146
GSE89843	Illumina HiSeq 2500	SRR5020519	platelet	28810146
GSE89843	Illumina HiSeq 2500	SRR5020509	platelet	28810146
GSE89843	Illumina HiSeq 2500	SRR5020510	platelet	28810146
GSE89843	Illumina HiSeq 2500	SRR5020511	platelet	28810146
GSE89843	Illumina HiSeq 2500	SRR5020513	platelet	28810146
GSE89843	Illumina HiSeq 2500	SRR5020512	platelet	28810146
GSE89843	Illumina HiSeq 2500	SRR5020506	platelet	28810146
GSE89843	Illumina HiSeq 2500	SRR5020508	platelet	28810146
GSE89843	Illumina HiSeq 2500	SRR5020507	platelet	28810146
GSE89843	Illumina HiSeq 2500	SRR5049010	platelet	28810146
GSE89843	Illumina HiSeq 2500	SRR5049009	platelet	28810146
GSE89843	Illumina HiSeq 2500	SRR5049008	platelet	28810146
GSE94384	Illumina HiSeq 2000	SRR5223046	platelet	28810146
GSE94384	Illumina HiSeq 2000	SRR5223045	platelet	28810146
GSE89843	Illumina HiSeq 2500	SRR5558732	platelet	28810146
GSE89843	Illumina HiSeq 2500	SRR5558788	platelet	28810146
GSE89843	Illumina HiSeq 2500	SRR5558787	platelet	28810146
GSE89843	Illumina HiSeq 2500	SRR5558786	platelet	28810146
GSE89843	Illumina HiSeq 2500	SRR5558785	platelet	28810146
GSE89843	Illumina HiSeq 2500	SRR5558782	platelet	28810146
GSE89843	Illumina HiSeq 2500	SRR5558781	platelet	28810146
GSE89843	Illumina HiSeq 2500	SRR5558780	platelet	28810146
GSE89843	Illumina HiSeq 2500	SRR5558779	platelet	28810146
GSE89843	Illumina HiSeq 2500	SRR5558778	platelet	28810146
GSE89843	Illumina HiSeq 2500	SRR5558777	platelet	28810146
GSE89843	Illumina HiSeq 2500	SRR5558776	platelet	28810146
GSE89843	Illumina HiSeq 2500	SRR5558775	platelet	28810146
GSE89843	Illumina HiSeq 2500	SRR5558774	platelet	28810146
GSE89843	Illumina HiSeq 2500	SRR5558773	platelet	28810146
GSE89843	Illumina HiSeq 2500	SRR5558772	platelet	28810146
GSE89843	Illumina HiSeq 2500	SRR5558771	platelet	28810146
GSE89843	Illumina HiSeq 2500	SRR5558770	platelet	28810146
GSE89843	Illumina HiSeq 2500	SRR5558769	platelet	28810146
GSE89843	Illumina HiSeq 2500	SRR5558768	platelet	28810146
GSE89843	Illumina HiSeq 2500	SRR5558767	platelet	28810146
GSE89843	Illumina HiSeq 2500	SRR5558766	platelet	28810146
GSE89843	Illumina HiSeq 2500	SRR5558765	platelet	28213379
GSE89843	Illumina HiSeq 2500	SRR5558764	platelet	28213379
GSE89843	Illumina HiSeq 2500	SRR5558763	platelet	28810146
GSE89843	Illumina HiSeq 2500	SRR5558762	platelet	28810146
GSE89843	Illumina HiSeq 2500	SRR5558761	platelet	28810146
GSE89843	Illumina HiSeq 2500	SRR5558760	platelet	28810146
GSE89843	Illumina HiSeq 2500	SRR5558759	platelet	28810146
GSE89843	Illumina HiSeq 2500	SRR5558758	platelet	28810146
GSE89843	Illumina HiSeq 2500	SRR5558757	platelet	28810146
GSE89843	Illumina HiSeq 2500	SRR5558756	platelet	28810146
GSE89843	Illumina HiSeq 2500	SRR5558755	platelet	28810146
GSE89843	Illumina HiSeq 2500	SRR5558754	platelet	28810146
GSE89843	Illumina HiSeq 2500	SRR5558753	platelet	28810146
GSE89843	Illumina HiSeq 2500	SRR5558752	platelet	28810146
GSE89843	Illumina HiSeq 2500	SRR5558751	platelet	28810146
GSE89843	Illumina HiSeq 2500	SRR5558750	platelet	28810146
GSE89843	Illumina HiSeq 2500	SRR5558749	platelet	28810146
GSE89843	Illumina HiSeq 2500	SRR5558748	platelet	28810146
GSE89843	Illumina HiSeq 2500	SRR5558747	platelet	28810146
GSE89843	Illumina HiSeq 2500	SRR5558746	platelet	28810146
GSE89843	Illumina HiSeq 2500	SRR5558745	platelet	28810146
GSE89843	Illumina HiSeq 2500	SRR5558744	platelet	28810146
GSE89843	Illumina HiSeq 2500	SRR5558743	platelet	28810146
GSE89843	Illumina HiSeq 2500	SRR5558742	platelet	28810146
GSE89843	Illumina HiSeq 2500	SRR5558741	platelet	28810146
GSE89843	Illumina HiSeq 2500	SRR5558740	platelet	28810146
GSE89843	Illumina HiSeq 2500	SRR5558739	platelet	28810146
GSE89843	Illumina HiSeq 2500	SRR5558738	platelet	28810146
GSE89843	Illumina HiSeq 2500	SRR5558737	platelet	28810146
GSE89843	Illumina HiSeq 2500	SRR5558736	platelet	28810146
GSE89843	Illumina HiSeq 2500	SRR5558735	platelet	28810146
GSE89843	Illumina HiSeq 2500	SRR5558734	platelet	28810146
GSE89843	Illumina HiSeq 2500	SRR5558733	platelet	28810146
GSE89843	Illumina HiSeq 2500	SRR5020148	platelet	28810146
GSE89843	Illumina HiSeq 2500	SRR5020145	platelet	28810146
GSE89843	Illumina HiSeq 2500	SRR5020142	platelet	28810146
GSE89843	Illumina HiSeq 2500	SRR5020611	platelet	28810146
GSE89843	Illumina HiSeq 2500	SRR5020607	platelet	28810146
unknown	Illumina HiSeq 2000	SRR5907427	platelet	28810146
unknown	Illumina HiSeq 2000	SRR5907428	platelet	28810146
unknown	Illumina HiSeq 2000	SRR5907425	platelet	28810146
unknown	Illumina HiSeq 2000	SRR5907426	platelet	28810146
unknown	Illumina HiSeq 2000	SRR5907423	platelet	28810146
unknown	Illumina HiSeq 2000	SRR5907424	platelet	28810146
unknown	Illumina Genome Analyzer IIx	SRR6131686	platelet	28810146
unknown	Illumina Genome Analyzer IIx	SRR6131685	platelet	28810146
GSE107868	Illumina HiSeq 2500	SRR6363439	platelet	28810146
GSE107868	Illumina HiSeq 2500	SRR6363440	platelet	28810146
GSE107868	Illumina HiSeq 2500	SRR6363505	platelet	28810146
GSE107868	Illumina HiSeq 2500	SRR6363506	platelet	28810146
GSE107868	Illumina HiSeq 2500	SRR6363504	platelet	28810146
GSE107868	Illumina HiSeq 2500	SRR6363503	platelet	28810146
GSE107868	Illumina HiSeq 2500	SRR6363502	platelet	28810146
GSE107868	Illumina HiSeq 2500	SRR6363501	platelet	28810146
GSE107868	Illumina HiSeq 2500	SRR6363500	platelet	28810146
GSE107868	Illumina HiSeq 2500	SRR6363499	platelet	28810146
GSE107868	Illumina HiSeq 2500	SRR6363498	platelet	28810146
GSE107868	Illumina HiSeq 2500	SRR6363497	platelet	28810146
GSE107868	Illumina HiSeq 2500	SRR6363496	platelet	28810146
GSE107868	Illumina HiSeq 2500	SRR6363495	platelet	28810146
GSE107868	Illumina HiSeq 2500	SRR6363494	platelet	28810146
GSE107868	Illumina HiSeq 2500	SRR6363493	platelet	28810146
GSE107868	Illumina HiSeq 2500	SRR6363492	platelet	29167233
GSE107868	Illumina HiSeq 2500	SRR6363491	platelet	29167233
GSE107868	Illumina HiSeq 2500	SRR6363490	platelet	29167233
GSE107868	Illumina HiSeq 2500	SRR6363489	platelet	29167233
GSE107868	Illumina HiSeq 2500	SRR6363488	platelet	29167233
GSE107868	Illumina HiSeq 2500	SRR6363487	platelet	29167233
GSE107868	Illumina HiSeq 2500	SRR6363486	platelet	21596849
GSE107868	Illumina HiSeq 2500	SRR6363485	platelet	21596849
GSE107868	Illumina HiSeq 2500	SRR6363484	platelet	30894694
GSE107868	Illumina HiSeq 2500	SRR6363483	platelet	30894694
GSE107868	Illumina HiSeq 2500	SRR6363482	platelet	30894694
GSE107868	Illumina HiSeq 2500	SRR6363481	platelet	30894694
GSE107868	Illumina HiSeq 2500	SRR6363480	platelet	30894694
GSE107868	Illumina HiSeq 2500	SRR6363479	platelet	30894694
GSE107868	Illumina HiSeq 2500	SRR6363478	platelet	30894694
GSE107868	Illumina HiSeq 2500	SRR6363477	platelet	30894694
GSE107868	Illumina HiSeq 2500	SRR6363476	platelet	30894694
GSE107868	Illumina HiSeq 2500	SRR6363475	platelet	30894694
GSE107868	Illumina HiSeq 2500	SRR6363474	platelet	30894694
GSE107868	Illumina HiSeq 2500	SRR6363473	platelet	30894694
GSE107868	Illumina HiSeq 2500	SRR6363472	platelet	30894694
GSE107868	Illumina HiSeq 2500	SRR6363471	platelet	30894694
GSE107868	Illumina HiSeq 2500	SRR6363470	platelet	30894694
GSE107868	Illumina HiSeq 2500	SRR6363469	platelet	30894694
GSE107868	Illumina HiSeq 2500	SRR6363468	platelet	30894694
GSE89843	Illumina HiSeq 2500	SRR5020528	platelet	30894694
GSE107868	Illumina HiSeq 2500	SRR6363467	platelet	30894694
GSE107868	Illumina HiSeq 2500	SRR6363466	platelet	30894694
GSE89843	Illumina HiSeq 2500	SRR5020017	platelet	30894694
GSE107868	Illumina HiSeq 2500	SRR6363465	platelet	30894694
GSE107868	Illumina HiSeq 2500	SRR6363464	platelet	30894694
GSE89843	Illumina HiSeq 2500	SRR5020014	platelet	30894694
GSE107868	Illumina HiSeq 2500	SRR6363463	platelet	30894694
GSE107868	Illumina HiSeq 2500	SRR6363462	platelet	30894694
GSE89843	Illumina HiSeq 2500	SRR5020603	platelet	30894694
GSE107868	Illumina HiSeq 2500	SRR6363461	platelet	30894694
GSE107868	Illumina HiSeq 2500	SRR6363460	platelet	30894694
GSE89843	Illumina HiSeq 2500	SRR5020601	platelet	30894694
GSE107868	Illumina HiSeq 2500	SRR6363459	platelet	30894694
GSE107868	Illumina HiSeq 2500	SRR6363458	platelet	30894694
GSE89843	Illumina HiSeq 2500	SRR5020599	platelet	30894694
GSE107868	Illumina HiSeq 2500	SRR6363457	platelet	30894694
GSE107868	Illumina HiSeq 2500	SRR6363456	platelet	30894694
GSE89843	Illumina HiSeq 2500	SRR5020590	platelet	30894694
GSE107868	Illumina HiSeq 2500	SRR6363455	platelet	30894694
GSE107868	Illumina HiSeq 2500	SRR6363454	platelet	30894694
GSE89843	Illumina HiSeq 2500	SRR5020588	platelet	30894694
GSE107868	Illumina HiSeq 2500	SRR6363453	platelet	30894694
GSE107868	Illumina HiSeq 2500	SRR6363452	platelet	30894694
GSE89843	Illumina HiSeq 2500	SRR5020586	platelet	28810146
GSE107868	Illumina HiSeq 2500	SRR6363451	platelet	30894694
GSE107868	Illumina HiSeq 2500	SRR6363444	platelet	30894694
GSE89843	Illumina HiSeq 2500	SRR5020581	platelet	28810146
GSE107868	Illumina HiSeq 2500	SRR6363443	platelet	30894694
GSE107868	Illumina HiSeq 2500	SRR6363445	platelet	30894694
GSE89843	Illumina HiSeq 2500	SRR5020577	platelet	28810146
GSE107868	Illumina HiSeq 2500	SRR6363450	platelet	30894694
GSE107868	Illumina HiSeq 2500	SRR6363449	platelet	30894694
GSE89843	Illumina HiSeq 2500	SRR5020572	platelet	28810146
GSE107868	Illumina HiSeq 2500	SRR6363448	platelet	30894694
GSE107868	Illumina HiSeq 2500	SRR6363447	platelet	30894694
GSE89843	Illumina HiSeq 2500	SRR5020569	platelet	28810146
GSE107868	Illumina HiSeq 2500	SRR6363446	platelet	30894694
GSE107868	Illumina HiSeq 2500	SRR6363442	platelet	30894694
GSE89843	Illumina HiSeq 2500	SRR5020567	platelet	28810146
GSE107868	Illumina HiSeq 2500	SRR6363441	platelet	30894694
GSE107868	Illumina HiSeq 2500	SRR6363438	platelet	30894694
GSE89843	Illumina HiSeq 2500	SRR5020554	platelet	28810146
GSE107868	Illumina HiSeq 2500	SRR6363437	platelet	30894694
GSE107868	Illumina HiSeq 2500	SRR6363436	platelet	30894694
GSE89843	Illumina HiSeq 2500	SRR5020549	platelet	28810146
GSE107868	Illumina HiSeq 2500	SRR6363435	platelet	30894694
GSE107868	Illumina HiSeq 2500	SRR6363434	platelet	30894694
GSE89843	Illumina HiSeq 2500	SRR5020538	platelet	28810146
GSE107868	Illumina HiSeq 2500	SRR6363433	platelet	30894694
GSE107868	Illumina HiSeq 2500	SRR6363432	platelet	30894694
GSE89843	Illumina HiSeq 2500	SRR5020536	platelet	28810146
GSE107868	Illumina HiSeq 2500	SRR6363431	platelet	30894694
GSE107868	Illumina HiSeq 2500	SRR6363430	platelet	30894694
GSE89843	Illumina HiSeq 2500	SRR5020532	platelet	28810146
GSE107868	Illumina HiSeq 2500	SRR6363429	platelet	30894694
GSE107868	Illumina HiSeq 2500	SRR6363428	platelet	30894694
GSE89843	Illumina HiSeq 2500	SRR5020530	platelet	28810146
GSE107868	Illumina HiSeq 2500	SRR6387355	platelet	30894694
GSE114710	Illumina HiSeq 2500	SRR7189587	platelet	30894694
GSE89843	Illumina HiSeq 2500	SRR5020605	platelet	28810146
GSE114710	Illumina HiSeq 2500	SRR7189586	platelet	30894694
GSE114710	Illumina HiSeq 2500	SRR7189585	platelet	30894694
GSE89843	Illumina HiSeq 2500	SRR5558784	platelet	28810146
GSE114710	Illumina HiSeq 2500	SRR7189584	platelet	30894694
GSE114710	Illumina HiSeq 2500	SRR7189583	platelet	30894694
GSE99737	Illumina HiSeq 2500	SRR5654953	platelet	28810146
GSE114710	Illumina HiSeq 2500	SRR7189594	platelet	30894694
GSE114710	Illumina HiSeq 2500	SRR7189593	platelet	30894694
GSE99737	Illumina HiSeq 2500	SRR5654971	platelet	28810146
GSE114710	Illumina HiSeq 2500	SRR7189592	platelet	30894694
GSE114710	Illumina HiSeq 2500	SRR7189591	platelet	30894694
GSE99737	Illumina HiSeq 2500	SRR5654969	platelet	28810146
GSE114710	Illumina HiSeq 2500	SRR7189590	platelet	30894694
GSE114710	Illumina HiSeq 2500	SRR7189589	platelet	30894694
GSE99737	Illumina HiSeq 2500	SRR5654966	platelet	28810146
GSE114710	Illumina HiSeq 2500	SRR7189588	platelet	30894694
[truncated: 39 more rows]
