# Supplementary material
Source: Research Square preprint supplement (doi:10.21203/rs.3.rs-9209612/v1)
Supplement: Supplementary file 3 [file fd936736d5e036bf1cc878e4.xlsx]

## Sheet: Supplementary Table S3
ONTOLOGY	ID	Description	GeneRatio	BgRatio	pvalue	p.adjust	qvalue	geneID	Count
BP	GO:0030593	neutrophil chemotaxis	46088	103/18723	5.56927e-06	0.000644793	0.000314875	6279/5473/6374	3
BP	GO:1990266	neutrophil migration	46088	122/18723	9.26913e-06	0.000644793	0.000314875	6279/5473/6374	3
BP	GO:0071621	granulocyte chemotaxis	46088	125/18723	9.97103e-06	0.000644793	0.000314875	6279/5473/6374	3
BP	GO:0097530	granulocyte migration	46088	148/18723	1.65511e-05	0.000802729	0.000392	6279/5473/6374	3
BP	GO:0097529	myeloid leukocyte migration	46088	220/18723	5.40976e-05	0.00199665	0.000975034	6279/5473/6374	3
BP	GO:0030595	leukocyte chemotaxis	46088	230/18723	6.17521e-05	0.00199665	0.000975034	6279/5473/6374	3
BP	GO:0060326	cell chemotaxis	46088	310/18723	0.000149764	0.00415061	0.00202689	6279/5473/6374	3
BP	GO:0010043	response to zinc ion	46060	58/18723	0.000196093	0.00435362	0.00212602	6279/760	2
BP	GO:0032496	response to lipopolysaccharide	46088	343/18723	0.000201972	0.00435362	0.00212602	6279/5473/6374	3
BP	GO:0002237	response to molecule of bacterial origin	46088	363/18723	0.000238743	0.00441912	0.00215801	6279/5473/6374	3
BP	GO:0050900	leukocyte migration	46088	369/18723	0.000250569	0.00441912	0.00215801	6279/5473/6374	3
BP	GO:0061844	antimicrobial humoral immune response mediated by antimicrobial peptide	46060	79/18723	0.000364128	0.00588674	0.0028747	5473/6374	2
BP	GO:0070098	chemokine-mediated signaling pathway	46060	88/18723	0.000451687	0.00674056	0.00329165	5473/6374	2
BP	GO:1990868	response to chemokine	46060	97/18723	0.000548506	0.00709402	0.00346425	5473/6374	2
BP	GO:1990869	cellular response to chemokine	46060	97/18723	0.000548506	0.00709402	0.00346425	5473/6374	2
BP	GO:0019730	antimicrobial humoral response	46060	122/18723	0.000865659	0.0104961	0.00512561	5473/6374	2
BP	GO:0034728	nucleosome organization	46060	167/18723	0.00161264	0.0184031	0.00898685	4778/23569	2
BP	GO:0006333	chromatin assembly or disassembly	46060	177/18723	0.00180894	0.0194963	0.00952072	4778/23569	2
BP	GO:0090087	regulation of peptide transport	46060	202/18723	0.00234717	0.0239659	0.0117034	6279/760	2
BP	GO:0071222	cellular response to lipopolysaccharide	46060	209/18723	0.00250994	0.0243464	0.0118892	5473/6374	2
BP	GO:0071219	cellular response to molecule of bacterial origin	46060	221/18723	0.00280116	0.0258774	0.0126368	5473/6374	2
BP	GO:0071824	protein-DNA complex subunit organization	46060	241/18723	0.00332046	0.0291579	0.0142388	4778/23569	2
BP	GO:0071216	cellular response to biotic stimulus	46060	246/18723	0.00345687	0.0291579	0.0142388	5473/6374	2
BP	GO:0006338	chromatin remodeling	46060	255/18723	0.003709	0.0299811	0.0146408	4778/23569	2
BP	GO:0015833	peptide transport	46060	264/18723	0.00396957	0.0308038	0.0150426	6279/760	2
BP	GO:0019755	one-carbon compound transport	46029	13/18723	0.004851	0.0328685	0.0160508	760	1
BP	GO:0070486	leukocyte aggregation	46029	13/18723	0.004851	0.0328685	0.0160508	6279	1
BP	GO:0042886	amide transport	46060	301/18723	0.00512856	0.0328685	0.0160508	6279/760	2
BP	GO:0035672	oligopeptide transmembrane transport	46029	14/18723	0.00522331	0.0328685	0.0160508	760	1
BP	GO:0038166	angiotensin-activated signaling pathway	46029	14/18723	0.00522331	0.0328685	0.0160508	760	1
BP	GO:0006959	humoral immune response	46060	317/18723	0.00567297	0.0328685	0.0160508	5473/6374	2
BP	GO:0006857	oligopeptide transport	46029	16/18723	0.00596759	0.0328685	0.0160508	760	1
BP	GO:0017014	protein nitrosylation	46029	16/18723	0.00596759	0.0328685	0.0160508	6279	1
BP	GO:0018119	peptidyl-cysteine S-nitrosylation	46029	16/18723	0.00596759	0.0328685	0.0160508	6279	1
BP	GO:0051238	sequestering of metal ion	46029	16/18723	0.00596759	0.0328685	0.0160508	6279	1
BP	GO:0002544	chronic inflammatory response	46029	18/18723	0.00671138	0.0328685	0.0160508	6279	1
BP	GO:0006337	nucleosome disassembly	46029	18/18723	0.00671138	0.0328685	0.0160508	4778	1
BP	GO:0042742	defense response to bacterium	46060	350/18723	0.00687687	0.0328685	0.0160508	6279/5473	2
BP	GO:0002523	leukocyte migration involved in inflammatory response	46029	19/18723	0.0070831	0.0328685	0.0160508	6279	1
BP	GO:0045780	positive regulation of bone resorption	46029	19/18723	0.0070831	0.0328685	0.0160508	760	1
BP	GO:0045947	negative regulation of translational initiation	46029	19/18723	0.0070831	0.0328685	0.0160508	55024	1
BP	GO:0015669	gas transport	46029	20/18723	0.00745471	0.0328685	0.0160508	760	1
BP	GO:0031498	chromatin disassembly	46029	20/18723	0.00745471	0.0328685	0.0160508	4778	1
BP	GO:0032986	protein-DNA complex disassembly	46029	20/18723	0.00745471	0.0328685	0.0160508	4778	1
BP	GO:0010038	response to metal ion	46060	373/18723	0.00777963	0.0330061	0.016118	6279/760	2
BP	GO:0071498	cellular response to fluid shear stress	46029	21/18723	0.00782619	0.0330061	0.016118	760	1
BP	GO:0006325	chromatin organization	46060	409/18723	0.00929582	0.0376316	0.0183768	4778/23569	2
BP	GO:1904385	cellular response to angiotensin	46029	25/18723	0.00931092	0.0376316	0.0183768	760	1
BP	GO:0045672	positive regulation of osteoclast differentiation	46029	26/18723	0.00968181	0.0383321	0.0187189	760	1
BP	GO:0018195	peptidyl-arginine modification	46029	27/18723	0.0100526	0.039004	0.019047	23569	1
BP	GO:1990776	response to angiotensin	46029	28/18723	0.0104232	0.0396491	0.019362	760	1
BP	GO:0019221	cytokine-mediated signaling pathway	46060	472/18723	0.012245	0.0456832	0.0223087	5473/6374	2
BP	GO:0050869	negative regulation of B cell activation	46029	34/18723	0.0126446	0.046284	0.0226021	55024	1
BP	GO:0034405	response to fluid shear stress	46029	35/18723	0.0130144	0.0467555	0.0228323	760	1
BP	GO:0006882	cellular zinc ion homeostasis	46029	38/18723	0.0141232	0.0498162	0.024327	6279	1
CC	GO:0034774	secretory granule lumen	46060	322/19550	0.00537706	0.0313982	0.0174975	6279/5473	2
CC	GO:0060205	cytoplasmic vesicle lumen	46060	325/19550	0.00547506	0.0313982	0.0174975	6279/5473	2
CC	GO:0031983	vesicle lumen	46060	327/19550	0.00554086	0.0313982	0.0174975	6279/5473	2
MF	GO:0045236	CXCR chemokine receptor binding	46060	18/18368	1.89924e-05	0.000816672	0.000179928	5473/6374	2
MF	GO:0008009	chemokine activity	46060	49/18368	0.000145161	0.00312096	0.000687605	5473/6374	2
MF	GO:0042379	chemokine receptor binding	46060	72/18368	0.000314187	0.00450335	0.00099217	5473/6374	2
MF	GO:0043177	organic acid binding	46060	135/18368	0.00109916	0.011816	0.00260327	23569/6279	2
MF	GO:0031406	carboxylic acid binding	46060	176/18368	0.00185751	0.0159746	0.0035195	23569/6279	2
MF	GO:0005125	cytokine activity	46060	235/18368	0.00328093	0.0176103	0.00387987	5473/6374	2
MF	GO:0050786	RAGE receptor binding	46029	10/18368	0.00380538	0.0176103	0.00387987	6279	1
MF	GO:0016813	hydrolase activity, acting on carbon-nitrogen (but not peptide) bonds, in linear amidines	46029	11/18368	0.00418523	0.0176103	0.00387987	23569	1
MF	GO:0005126	cytokine receptor binding	46060	271/18368	0.00433707	0.0176103	0.00387987	5473/6374	2
MF	GO:0035325	Toll-like receptor binding	46029	12/18368	0.00456496	0.0176103	0.00387987	6279	1
MF	GO:0001664	G protein-coupled receptor binding	46060	295/18368	0.00511836	0.0176103	0.00387987	5473/6374	2
MF	GO:0004089	carbonate dehydratase activity	46029	14/18368	0.00532405	0.0176103	0.00387987	760	1
MF	GO:0036041	long-chain fatty acid binding	46029	14/18368	0.00532405	0.0176103	0.00387987	6279	1
MF	GO:0005355	glucose transmembrane transporter activity	46029	22/18368	0.00835544	0.0230481	0.00507792	5473	1
MF	GO:0015149	hexose transmembrane transporter activity	46029	22/18368	0.00835544	0.0230481	0.00507792	5473	1
MF	GO:0015145	monosaccharide transmembrane transporter activity	46029	24/18368	0.00911205	0.0230481	0.00507792	5473	1
MF	GO:0043274	phospholipase binding	46029	24/18368	0.00911205	0.0230481	0.00507792	55024	1
MF	GO:0051119	sugar transmembrane transporter activity	46029	27/18368	0.010246	0.0240433	0.00529718	5473	1
MF	GO:0003953	NAD+ nucleosidase activity	46029	28/18368	0.0106238	0.0240433	0.00529718	55024	1
MF	GO:0050699	WW domain binding	46029	32/18368	0.0121335	0.0260871	0.00574747	4778	1
MF	GO:0048018	receptor ligand activity	46060	487/18368	0.0134861	0.0271386	0.00597913	5473/6374	2
MF	GO:0030546	signaling receptor activator activity	46060	495/18368	0.0139129	0.0271386	0.00597913	5473/6374	2
MF	GO:0005504	fatty acid binding	46029	39/18368	0.0147709	0.0271386	0.00597913	6279	1
MF	GO:0015144	carbohydrate transmembrane transporter activity	46029	40/18368	0.0151471	0.0271386	0.00597913	5473	1
MF	GO:0016799	hydrolase activity, hydrolyzing N-glycosyl compounds	46029	50/18368	0.018903	0.0325026	0.00716092	55024	1
MF	GO:0016597	amino acid binding	46029	52/18368	0.0196527	0.0325026	0.00716092	23569	1
MF	GO:0016836	hydro-lyase activity	46029	64/18368	0.0241407	0.0384463	0.00847041	760	1
MF	GO:0033293	monocarboxylic acid binding	46029	73/18368	0.0274951	0.0422245	0.00930284	6279	1
MF	GO:0016835	carbon-oxygen lyase activity	46029	79/18368	0.0297258	0.0436714	0.00962161	760	1
MF	GO:0035591	signaling adaptor activity	46029	81/18368	0.0304684	0.0436714	0.00962161	55024	1
MF	GO:0048306	calcium-dependent protein binding	46029	88/18368	0.0330637	0.0458626	0.0101044	6279	1
